# Supplementary material for: Variation in Human Milk Composition Is Related to Differences in Milk and Infant Fecal Microbial Communities
Source: MDPI journal article supplement (doi:10.3390/microorganisms9061153), 2021-05-27
Supplement: s1 [file s1]

## **Variation in human milk composition is related to differences in milk and infant fecal microbial communities**

Figure S1: Relative abundances of the initial top 25 bacterial genera in milk before and after prevalence-based filtering

Figure S2: Milk and infant fecal microbiome beta diversities and most abundant taxa

Figure S3: Differences in the alpha and beta diversities of milk and infant fecal community state types

Figure S4: HMO composition

Table S1: Selected cohort characteristics

Table S2: Milk microbial community state type (lactotype) characteristics

Table S3: Infant fecal microbial community state type (enterotype) characteristics

Table S4: Indicator taxa of the microbial lactotypes

Table S5: Indicator taxa of the infant microbial enterotypes

Table S6: HMO concentrations and ratios among microbial lactotypes

Table S7: HMO concentrations and ratios between enterotypes

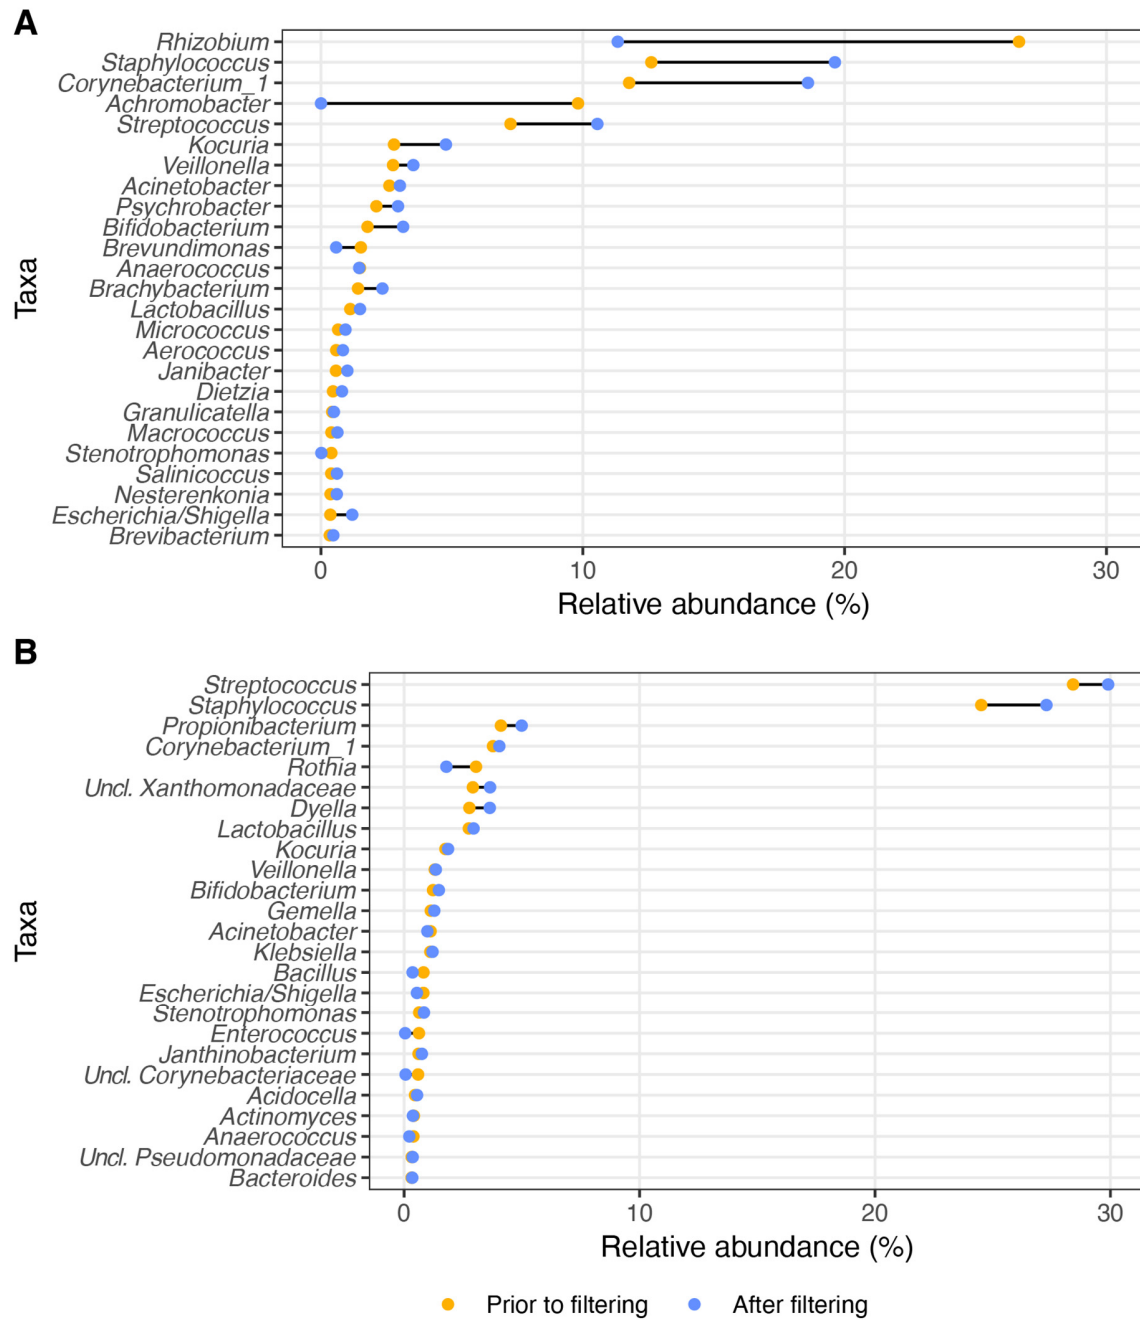

**Figure S1.** Relative abundances of the initial top 25 bacterial genera in milk before and after prevalence-based filtering. **(A)** Rural Ethiopia cohort and **(B)** all other. For the ETR milk samples, 580 of the initial 2,511 ASVs were validated to have statistical support as non-contaminants. For the remaining population cohort samples, 1,761 of the initial 8,964 ASVs were validated to have statistical support as non-contaminants. In general, there were marginal differences in the relative abundance of the most abundant genera (e.g., *Staphylococcus* and *Streptococcus*). Overall, most ASVs marked as contaminants in milk came from very low abundant genera (i.e., less than 0.001% across all milk samples). Only two of the initially most abundant taxa in milk were observed to have reductions in abundance > 10% (*Achromobacter* and *Rhizobium* in the ETR cohort). The reduction of *Rhizobium* abundance in the ETR cohort was attributed to the removal of a single *Rhizobium* ASV, although another abundant and prevalent *Rhizobium* ASV in the ETR samples not found in the respective negative controls was retained. Within the ETR samples the initial top 25 genera represented ~91% of all genera (from 458 genera) and in the decontam-filtered samples the top 25 genera represented ~92% of all genera (from 137 genera). Similarly, in the remaining population cohorts the initial top 25 genera represented ~86% of all genera (from 983 genera) and in the decontam-filtered samples the top 25 genera represented ~92% of all genera (from 334 genera).

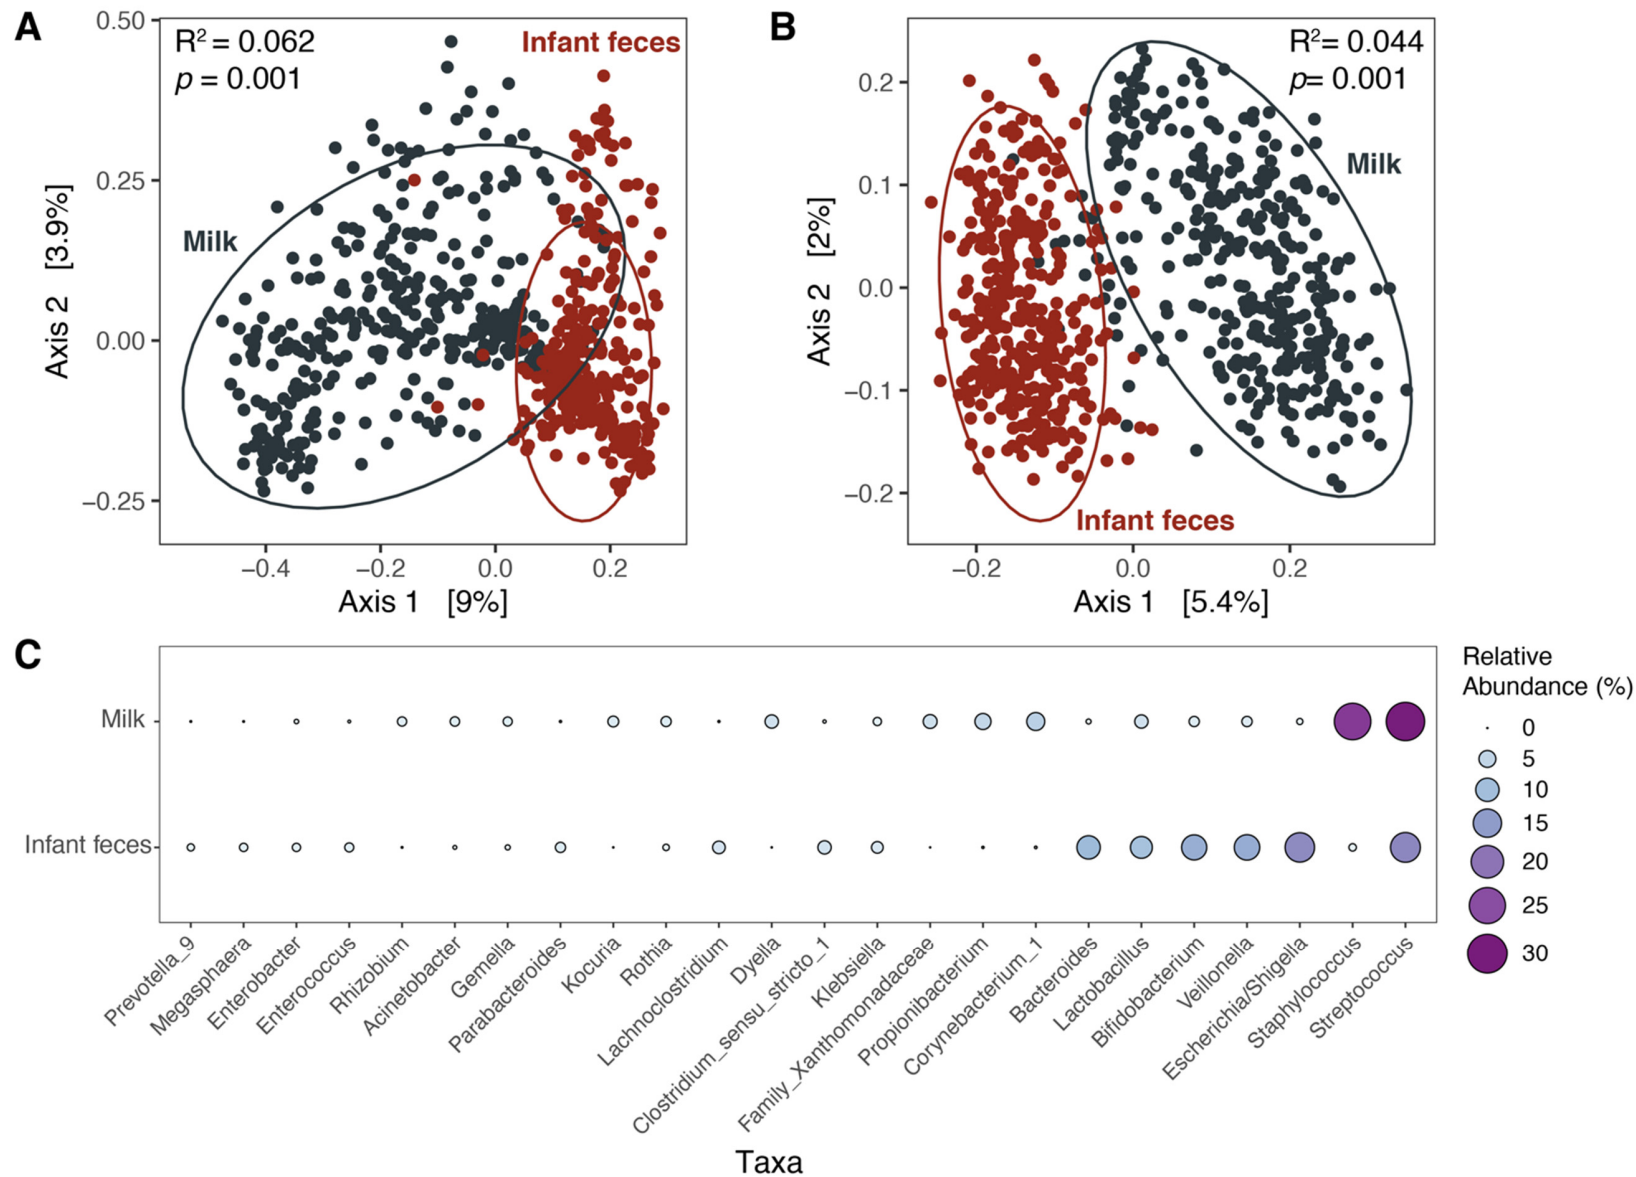

**Figure S2.** Milk and infant fecal microbiome beta diversities and most abundant taxa. **(A)** Microbial community structure (Bray-Curtis). **(B)** Microbial community membership (binary Jaccard). Differences between sample types were tested using PERMANOVA as implemented in vegan, with  $R^2$  and  $p$  values listed. Ellipses represent the 95% confidence ellipses. **(C)** Bubble plot showing the most abundant taxa in milk and infant feces.

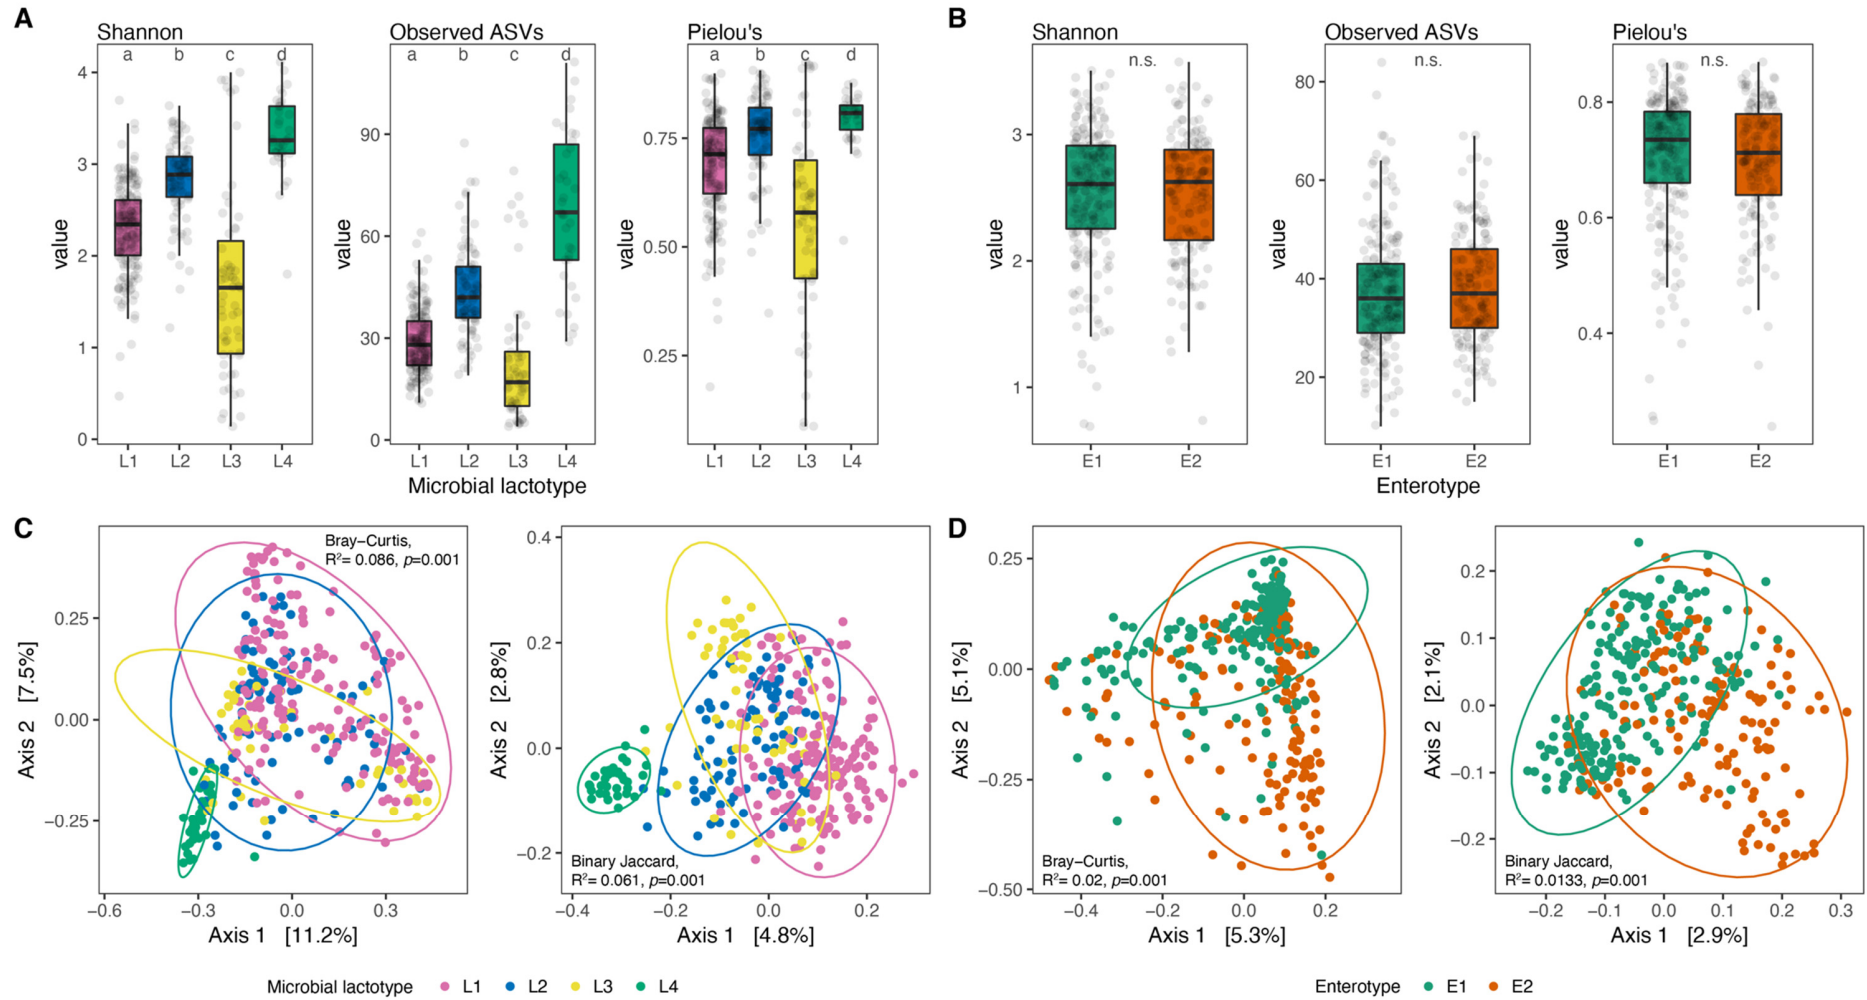

**Figure S3.** Differences in the alpha and beta diversities of milk and infant fecal community state types. The alpha and beta diversities of milk (**A,C**) and infant feces (**B,D**) were assessed and differences among and between community state types tested. Alpha diversity of milk (**A**) and infant feces was (**B**) assessed by computing Shannon diversity, observed ASVs, and Pielou's evenness metrics, and differences in these metrics was tested using the Kruskal-Wallis test, followed by Dunn's test (in milk samples) and the Mann-Whitney test (infant fecal). The beta diversities of milk (**C**) and infant feces (**D**) were assessed using Bray-Curtis and binary Jaccard metrics, with differences in community state types tested using PERMANOVA as implemented in vegan. Letters in panels **A** and **B** represent groups that statistically differ from one another ( $p < 0.05$ ); n.s., not significant. Ellipses in panels **C** and **D** represent the 95% confidence ellipses.

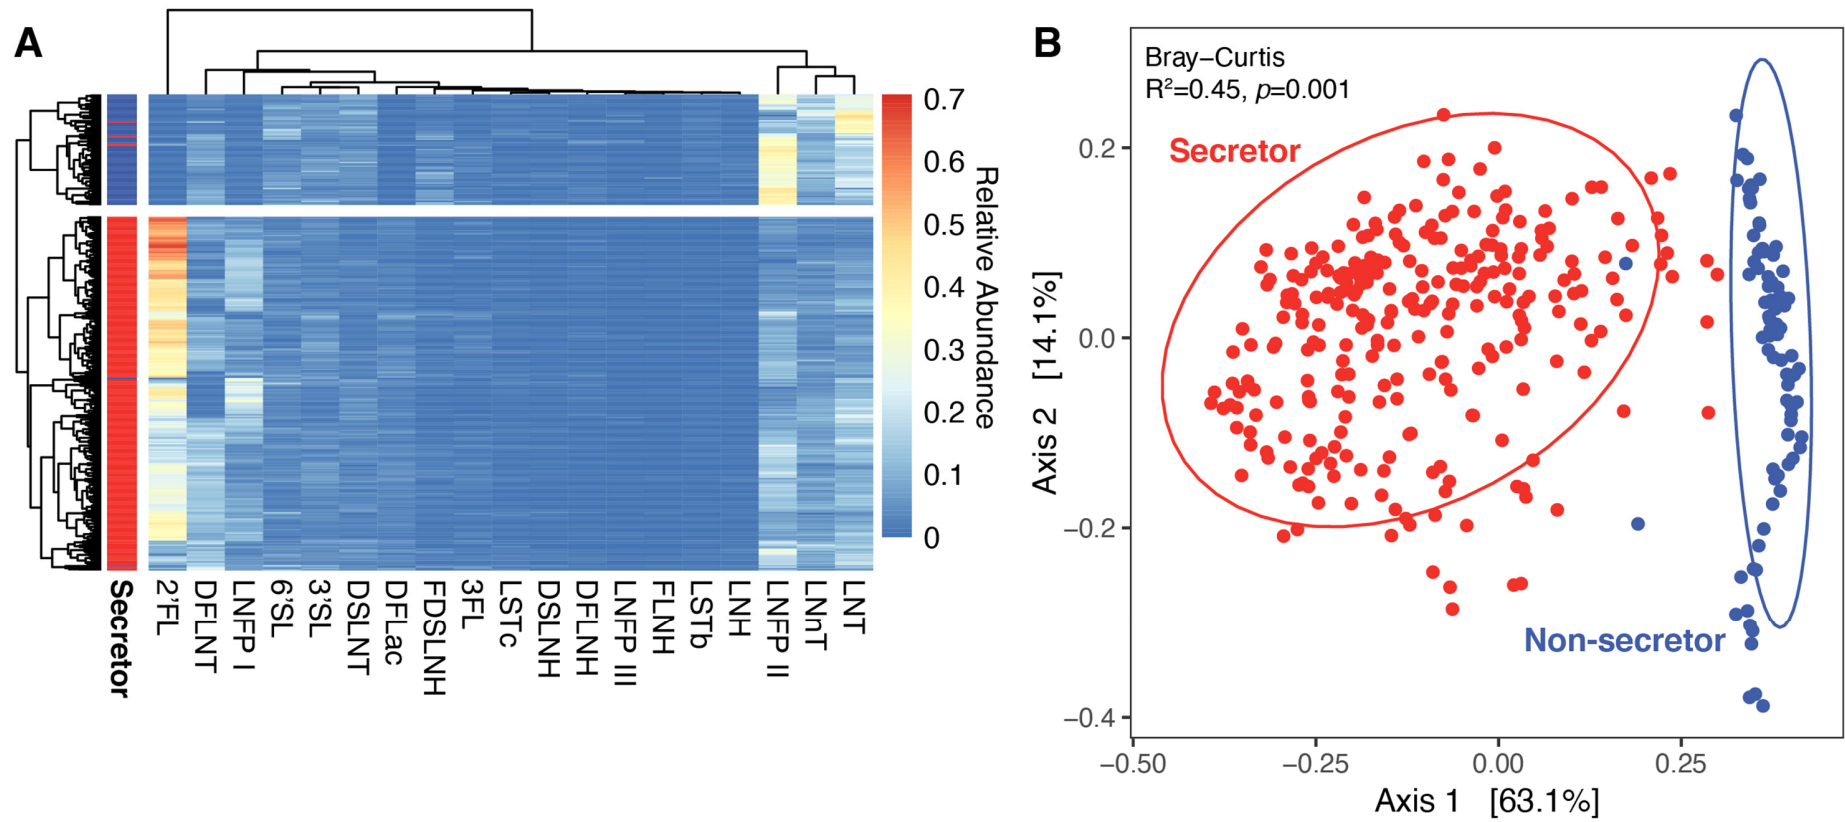

**Figure S4.** HMO composition. **(A)** Heatmap of the relative abundances of the 19 HMOs that represent the majority of HMOs present in milk. Maternal secretor status is denoted on the left-hand side (secretors, red; non-secretors, blue). Samples and HMOs are hierarchically clustered. **(B)** Multidimensional scaling (MDS) of HMO profiles based on Bray-Curtis distance. Samples are colored by maternal secretor status, and PERMANOVA  $R^2$  and  $p$  values are given. Ellipses represent 95% confidence ellipses.

**Table S1. Selected cohort characteristics**

| Characteristic                                    | Population     |               |               |               |               |              |              |              |              |              |               |               | <i>p</i> |
|---------------------------------------------------|----------------|---------------|---------------|---------------|---------------|--------------|--------------|--------------|--------------|--------------|---------------|---------------|----------|
|                                                   | All<br>(n=357) | ETR<br>(n=40) | ETU<br>(n=26) | GBR<br>(n=37) | GBU<br>(n=36) | GN<br>(n=28) | KE<br>(n=41) | PE<br>(n=42) | SP<br>(n=36) | SW<br>(n=21) | USC<br>(n=12) | USW<br>(n=38) |          |
| Maternal age (y) <sup>1</sup>                     | 27.4±6.1       | 24.6±5.1      | 22.2±3.5      | 27.1±7.4      | 26.9±5.0      | 27.4±5.6     | 25.3±5.2     | 26.6±6.4     | 34.5±3.5     | 30.1±4.9     | 30.6±4.7      | 29.1±5.1      | <0.001   |
| Time postpartum (d) <sup>2</sup>                  | 64.6±21.9      | 70.9±31.9     | 58.3±15.3     | 64.6±16.6     | 61.6±18.1     | 59±20.3      | 72.9±23.9    | 60.3±17      | 72.3±24.8    | 48.8±19.2    | 59.1±19.9     | 68.1±16       | <0.001   |
| Parity (n)                                        | 2.4±1.9        | 3.5±2.1       | 1.6±1.1       | 4.2±3.2       | 3.3±2         | 2.1±1        | 2.5±1.4      | 2±1.0        | 1.3±0.7      | 1.5±0.7      | 1.8±0.7       | 1.8±1.1       | <0.001   |
| Body mass index (kg/m <sup>2</sup> ) <sup>3</sup> | 24.2±4.6       | 21.3±2.8      | 22.1±3.2      | 21.4±2.9      | 23.1±3.3      | 24.6±4.2     | 23.7±3.7     | 28±5.4       | 23.3±3.5     | 25.7±4.3     | 29±4.5        | 26.9±5.3      | <0.001   |
| Vaginal delivery, n (%) <sup>4</sup>              | 303 (86)       | 39 (100)      | 26 (100)      | 37 (100)      | 35 (97)       | 24 (89)      | 32 (80)      | 22 (52)      | 33 (92)      | 17 (81)      | 8 (67)        | 30 (79)       | <0.001   |
| Infant sex, Female, n (%) <sup>5</sup>            | 174 (49)       | 17 (44)       | 12 (46)       | 16 (44)       | 21 (58)       | 12 (43)      | 23 (56)      | 23 (55)      | 17 (47)      | 9 (43)       | 3 (27)        | 21 (55)       | 0.73     |
| Infant weight-for-length z-score <sup>6</sup>     | 0.1±0.1        | -0.3±1.0      | -0.6±1.5      | 0.5±1.2       | -0.1±1.1      | -0.2±1.4     | 1.4±2.2      | 0.6±1.3      | -0.3±1.1     | -0.4±1.0     | 0.7±2.9       | -1.0±1.1      | <0.001   |
| Exclusively breastfeeding, n (%) <sup>7</sup>     | 212 (60)       | 38 (95)       | 23 (89)       | 36 (97)       | 19 (53)       | 8 (29)       | 15 (37)      | 13 (31)      | 23 (64)      | 9 (43)       | 6 (50)        | 22 (60)       | <0.001   |

**Footnote:** Categorical data are given as number of participants and, in parentheses, percent of total. Continuous data are provided as means ± standard deviation; *p* values were calculated from Kruskal-Wallis test for continuous data and Chi-squared test for categorical data. Infant weight-for-length z-scores were based on the 2006 WHO growth reference. <sup>1</sup>, missing values for 3 dyads: 2 in GBR and 1 in GBU; <sup>2</sup>, missing values for 1 dyad in GBR; <sup>3</sup>, missing values for 7 dyads: 1 from GN, 2 from KE, 4 from USW; <sup>4</sup>, missing values for 3 dyads: 1 in ETR, GN, and KE; <sup>5</sup>, missing values for 3 dyads: 1 in ETR, GBR, and USC; <sup>6</sup>, missing values for 10 dyads: 1 in ETR/GBR/GBU KE, 4 in USC, and 2 USW; <sup>7</sup>, missing values for 1 dyad in USW.

| Table S2. Milk microbial community state type (lactotype) characteristics |                     |           |           |           |          |              |
|---------------------------------------------------------------------------|---------------------|-----------|-----------|-----------|----------|--------------|
| Characteristic                                                            | Microbial Lactotype |           |           |           | <i>p</i> | FDR <i>p</i> |
|                                                                           | L1 (n=178)          | L2 (n=85) | L3 (n=59) | L4 (n=35) |          |              |
| Maternal age (y) <sup>1</sup>                                             | 28.2±5.8            | 26.1±6.7  | 28.9±5.9  | 24.2±4.4  | <0.001   | 0.002        |
| Time postpartum (d) <sup>2</sup>                                          | 61.8±20.5           | 69.1±19.8 | 62.1±18.8 | 71.8±33.6 | 0.030    | 0.045        |
| Parity (n)                                                                | 2.0±1.4             | 3.0±2.5   | 2.2±1.4   | 3.4±1.9   | <0.001   | 0.002        |
| Maternal body mass index (kg/m <sup>2</sup> ) <sup>3</sup>                | 25.5±4.8            | 22.8±4.2  | 23.9±3.9  | 21.3±2.9  | <0.001   | 0.002        |
| Maternal secretor status (secretor), n (%)                                | 147 (83)            | 68 (80)   | 38 (64)   | 21 (60)   | 0.002    | 0.004        |
| Vaginal delivery, n (%) <sup>4</sup>                                      | 146 (82)            | 73 (87)   | 50 (86)   | 34 (100)  | 0.053    | 0.060        |
| Infant sex, Female, n (%) <sup>5</sup>                                    | 88 (50)             | 45 (54)   | 27 (46)   | 14 (41)   | 0.612    | 0.612        |
| Infant weight-for-length z-score <sup>6</sup>                             | 0.0±1.6             | 0.4±1.6   | 0.0±1.3   | -0.3±1.1  | 0.053    | 0.060        |
| Exclusively breastfeeding, n (%) <sup>7</sup>                             | 99 (56)             | 54 (64)   | 25 (42)   | 34 (97)   | <0.001   | 0.002        |

**Footnote:** Categorical data are given as number of participants and, in parentheses, percent of total. Continuous data are provided as means ± standard deviation; *p* values were calculated from Kruskal-Wallis test for continuous data and Chi-squared test for categorical data. Infant weight-for-length z-scores were based on the 2006 WHO growth reference. <sup>1</sup>, missing values for 3 dyads: 2 in GBR and 1 in GBU; <sup>2</sup>, missing values for 1 dyad in GBR; <sup>3</sup>, missing values for 7 dyads: 1 from GN, 2 from KE, 4 from USW; <sup>4</sup>, missing values for 3 dyads: 1 in ETR, GN, and KE; <sup>5</sup>, missing values for 3 dyads: 1 in ETR, GBR, and USC; <sup>6</sup>, missing values for 10 dyads: 1 in ETR/GBR/GBU KE, 4 in USC, and 2 USW; <sup>7</sup>, missing values for 1 dyad in USW.

**Table S3. Infant fecal microbial community state type (enterotype) characteristics**

| Characteristic                                             | Microbial enterotype |            |          |              |
|------------------------------------------------------------|----------------------|------------|----------|--------------|
|                                                            | E1 (n=207)           | E2 (n=150) | <i>p</i> | FDR <i>p</i> |
| Maternal age (y) <sup>1</sup>                              | 28.1±6.2             | 26.6±5.9   | 0.022    | 0.040        |
| Time postpartum (d) <sup>2</sup>                           | 66±23.3              | 62±19.6    | 0.202    | 0.260        |
| Parity (n)                                                 | 2.2±1.7              | 2.8±2.0    | <0.001   | 0.009        |
| Maternal body mass index (kg/m <sup>2</sup> ) <sup>3</sup> | 24.8±4.9             | 23.3±4.0   | 0.003    | 0.012        |
| Maternal secretor status (secretor), n (%)                 | 155 (75)             | 119 (79)   | 0.392    | 0.441        |
| Vaginal delivery, n (%) <sup>4</sup>                       | 170 (83)             | 132 (89)   | 0.182    | 0.260        |
| Infant sex, Female, n (%) <sup>5</sup>                     | 97 (48)              | 77 (51)    | 0.551    | 0.551        |
| Infant weight-for-length z-score <sup>6</sup>              | -0.1±1.7             | 0.2±1.4    | 0.004    | 0.012        |
| Exclusively breastfeeding, n (%) <sup>7</sup>              | 112 (54)             | 102 (69)   | 0.009    | 0.020        |

**Footnote:** Categorical data are given as number of participants and, in parentheses, percent of total. Continuous data are provided as means ± standard deviation; *p* values were calculated from Mann-Whitney test for continuous data and Chi-squared test for categorical data. Infant weight-for-length z-scores were based on the 2006 WHO growth reference. <sup>1</sup>, missing values for 3 dyads: 2 in GBR and 1 in GBU; <sup>2</sup>, missing values for 1 dyad in GBR; <sup>3</sup>, missing values for 7 dyads: 1 from GN, 2 from KE, 4 from USW; <sup>4</sup>, missing values for 3 dyads: 1 in ETR, GN, and KE; <sup>5</sup>, missing values for 3 dyads: 1 in ETR, GBR, and USC; <sup>6</sup>, missing values for 10 dyads: 1 in ETR/GBR/GBU KE, 4 in USC, and 2 USW; <sup>7</sup>, missing values for 1 dyad in USW.



**Table S4. Indicator taxa of the microbial lactotypes**

| Taxa                                | Microbial lactotype | indval | <i>p</i> | frequency | FDR <i>p</i> |
|-------------------------------------|---------------------|--------|----------|-----------|--------------|
| Family Xanthomonadaceae             | L1                  | 0.54   | 0.001    | 235       | 0.006        |
| <i>Dyella</i>                       | L1                  | 0.48   | 0.001    | 242       | 0.006        |
| <i>Janthinobacterium</i>            | L1                  | 0.41   | 0.001    | 185       | 0.006        |
| <i>Streptococcus</i>                | L1                  | 0.41   | 0.001    | 348       | 0.006        |
| <i>Acidocella</i>                   | L1                  | 0.34   | 0.001    | 178       | 0.006        |
| <i>Flavobacterium</i>               | L1                  | 0.22   | 0.001    | 73        | 0.006        |
| <i>Aeromonas</i>                    | L1                  | 0.34   | 0.002    | 144       | 0.011        |
| <i>Rothia</i>                       | L1                  | 0.28   | 0.003    | 155       | 0.015        |
| <i>Fluviicola</i>                   | L1                  | 0.09   | 0.006    | 20        | 0.028        |
| Family Caulobacteraceae             | L1                  | 0.10   | 0.014    | 22        | 0.049        |
| Family Clostridiaceae 1             | L1                  | 0.11   | 0.02     | 23        | 0.064        |
| <i>Ralstonia</i>                    | L1                  | 0.07   | 0.023    | 17        | 0.071        |
| <i>Yersinia</i>                     | L1                  | 0.20   | 0.025    | 104       | 0.075        |
| Phylum Parcubacteria                | L1                  | 0.09   | 0.029    | 26        | 0.084        |
| <i>Burkholderia</i>                 | L1                  | 0.08   | 0.039    | 27        | 0.104        |
| <i>Fodinicola</i>                   | L1                  | 0.07   | 0.048    | 16        | 0.124        |
| <i>Hydrotaea</i>                    | L1                  | 0.07   | 0.058    | 19        | 0.142        |
| <i>Bradyrhizobium</i>               | L1                  | 0.08   | 0.089    | 29        | 0.210        |
| <i>Morganella</i>                   | L1                  | 0.07   | 0.103    | 25        | 0.240        |
| <i>Clostridium sensu stricto</i> 18 | L1                  | 0.07   | 0.128    | 21        | 0.283        |
| <i>Clostridium sensu stricto</i> 9  | L1                  | 0.04   | 0.131    | 10        | 0.286        |
| Family Bacillaceae                  | L1                  | 0.05   | 0.134    | 15        | 0.286        |
| hgcl clade                          | L1                  | 0.03   | 0.134    | 6         | 0.286        |
| <i>Alpinimonas</i>                  | L1                  | 0.04   | 0.156    | 8         | 0.316        |
| <i>Sediminibacterium</i>            | L1                  | 0.03   | 0.168    | 8         | 0.330        |
| <i>Cytophaga</i>                    | L1                  | 0.03   | 0.177    | 5         | 0.333        |
| <i>Acidovorax</i>                   | L1                  | 0.05   | 0.204    | 19        | 0.353        |
| <i>Limnohabitans</i>                | L1                  | 0.05   | 0.221    | 18        | 0.377        |
| <i>Candidatus Flaviluna</i>         | L1                  | 0.02   | 0.228    | 4         | 0.387        |
| <i>Achromobacter</i>                | L1                  | 0.02   | 0.231    | 4         | 0.390        |
| <i>Acidibacter</i>                  | L1                  | 0.03   | 0.25     | 8         | 0.409        |
| Phylum SM2F11                       | L1                  | 0.02   | 0.263    | 4         | 0.424        |
| <i>Azorhizobium</i>                 | L1                  | 0.02   | 0.264    | 4         | 0.424        |
| Family Microbacteriaceae            | L1                  | 0.02   | 0.264    | 4         | 0.424        |
| <i>Kingella</i>                     | L1                  | 0.02   | 0.276    | 4         | 0.439        |
| <i>Candidatus Rhodoluna</i>         | L1                  | 0.03   | 0.282    | 13        | 0.445        |
| <i>Pseudarcicella</i>               | L1                  | 0.03   | 0.312    | 12        | 0.484        |
| Family Pseudomonadaceae             | L1                  | 0.09   | 0.326    | 69        | 0.504        |
| Phylum Bacteroidetes                | L1                  | 0.03   | 0.329    | 7         | 0.506        |

|                                     |    |      |       |     |       |
|-------------------------------------|----|------|-------|-----|-------|
| <i>Candidatus Planktoluna</i>       | L1 | 0.02 | 0.365 | 3   | 0.554 |
| PRD01a011B                          | L1 | 0.02 | 0.392 | 3   | 0.587 |
| <i>Pantoea</i>                      | L1 | 0.04 | 0.393 | 14  | 0.587 |
| <i>Schlegelella</i>                 | L1 | 0.03 | 0.399 | 12  | 0.594 |
| <i>Phenylobacterium</i>             | L1 | 0.02 | 0.412 | 3   | 0.610 |
| Phylum Proteobacteria               | L1 | 0.02 | 0.431 | 3   | 0.628 |
| <i>Rhodococcus</i>                  | L1 | 0.02 | 0.454 | 9   | 0.646 |
| <i>Rheinheimera</i>                 | L1 | 0.02 | 0.462 | 4   | 0.650 |
| <i>Mesorhizobium</i>                | L1 | 0.02 | 0.466 | 8   | 0.652 |
| <i>Propionivibrio</i>               | L1 | 0.02 | 0.481 | 5   | 0.666 |
| <i>Candidatus Planktophila</i>      | L1 | 0.03 | 0.508 | 12  | 0.671 |
| Order GR-WP33-30                    | L1 | 0.02 | 0.508 | 4   | 0.671 |
| Family NS11-12 marine group         | L1 | 0.02 | 0.51  | 4   | 0.671 |
| <i>Ewingella</i>                    | L1 | 0.01 | 0.6   | 5   | 0.766 |
| <i>Cellulomonas</i>                 | L1 | 0.01 | 0.607 | 2   | 0.766 |
| <i>Dechloromonas</i>                | L1 | 0.01 | 0.607 | 2   | 0.766 |
| <i>Nubsella</i>                     | L1 | 0.01 | 0.607 | 2   | 0.766 |
| <i>Mangroviflexus</i>               | L1 | 0.01 | 0.611 | 2   | 0.766 |
| <i>Gemella</i>                      | L1 | 0.18 | 0.612 | 163 | 0.766 |
| Phylum TM6                          | L1 | 0.01 | 0.612 | 2   | 0.766 |
| <i>Marinomonas</i>                  | L1 | 0.01 | 0.629 | 2   | 0.782 |
| Family Comamonadaceae               | L1 | 0.01 | 0.637 | 2   | 0.784 |
| <i>Helicobacter</i>                 | L1 | 0.01 | 0.641 | 2   | 0.786 |
| <i>Gordonia</i>                     | L1 | 0.01 | 0.646 | 2   | 0.789 |
| Phylum Candidate division SR1       | L1 | 0.01 | 0.649 | 4   | 0.789 |
| <i>Caulobacter</i>                  | L1 | 0.01 | 0.65  | 2   | 0.789 |
| Family Holophagaceae                | L1 | 0.01 | 0.661 | 2   | 0.800 |
| Family Rhodobiaceae                 | L1 | 0.01 | 0.678 | 3   | 0.815 |
| <i>Paludibacter</i>                 | L1 | 0.01 | 0.691 | 2   | 0.821 |
| <i>Thauera</i>                      | L1 | 0.01 | 0.691 | 2   | 0.821 |
| <i>Tolumonas</i>                    | L1 | 0.01 | 0.696 | 3   | 0.823 |
| <i>Legionella</i>                   | L1 | 0.01 | 0.712 | 2   | 0.839 |
| <i>Candidatus Aquiluna</i>          | L1 | 0.01 | 0.721 | 3   | 0.842 |
| <i>Romboutsia</i>                   | L1 | 0.01 | 0.725 | 6   | 0.844 |
| <i>Clostridium sensu stricto</i> 13 | L1 | 0.01 | 0.734 | 3   | 0.850 |
| <i>Hyphomicrobium</i>               | L1 | 0.01 | 0.737 | 5   | 0.850 |
| <i>Sphingorhabdus</i>               | L1 | 0.01 | 0.742 | 3   | 0.852 |
| <i>Tepidimonas</i>                  | L1 | 0.01 | 0.751 | 2   | 0.860 |
| Lachnospiraceae UCG-001             | L1 | 0.01 | 0.765 | 2   | 0.867 |
| <i>Haemophilus</i>                  | L1 | 0.04 | 0.767 | 33  | 0.867 |
| <i>Pseudomonas</i>                  | L1 | 0.10 | 0.784 | 93  | 0.881 |
| <i>Herbaspirillum</i>               | L1 | 0.01 | 0.836 | 6   | 0.922 |

|                                  |    |      |       |     |       |
|----------------------------------|----|------|-------|-----|-------|
| <i>Tepidiphilus</i>              | L1 | 0.01 | 0.866 | 3   | 0.947 |
| <i>Alcaligenes</i>               | L1 | 0.01 | 0.892 | 5   | 0.969 |
| <i>Scardovia</i>                 | L1 | 0.01 | 0.924 | 4   | 0.998 |
| <i>Cloacibacterium</i>           | L1 | 0.01 | 0.951 | 12  | 1.000 |
| Phylum WCHB1-60                  | L1 | 0.01 | 0.953 | 3   | 1.000 |
| <i>Azotobacter</i>               | L1 | 0.01 | 0.979 | 4   | 1.000 |
| <i>Bordetella</i>                | L1 | 0.01 | 1     | 1   | 1.000 |
| <i>Candidatus Alysiosphaera</i>  | L1 | 0.01 | 1     | 1   | 1.000 |
| Class WCHB1-32                   | L1 | 0.01 | 1     | 1   | 1.000 |
| Family Bacteroidales S24-7 group | L1 | 0.01 | 1     | 1   | 1.000 |
| Family DSSF69                    | L1 | 0.01 | 1     | 1   | 1.000 |
| Family Gemmatimonadaceae         | L1 | 0.01 | 1     | 1   | 1.000 |
| <i>Geodermatophilus</i>          | L1 | 0.01 | 1     | 1   | 1.000 |
| <i>Pelosinus</i>                 | L1 | 0.01 | 1     | 1   | 1.000 |
| <i>Serratia</i>                  | L1 | 0.01 | 1     | 1   | 1.000 |
| <i>Sorangium</i>                 | L1 | 0.01 | 1     | 1   | 1.000 |
| <i>Sulfuricurvum</i>             | L1 | 0.01 | 1     | 1   | 1.000 |
| Family KCM-B-15                  | L1 | 0.01 | 1     | 2   | 1.000 |
| Class Bacilli                    | L1 | 0.01 | 1     | 2   | 1.000 |
| Family Paenibacillaceae          | L1 | 0.00 | 1     | 2   | 1.000 |
| Family Nocardiodiaceae           | L1 | 0.00 | 1     | 2   | 1.000 |
| <i>Paracoccus</i>                | L2 | 0.31 | 0.001 | 69  | 0.006 |
| <i>Microvirga</i>                | L2 | 0.14 | 0.001 | 13  | 0.006 |
| <i>Mobilicoccus</i>              | L2 | 0.13 | 0.001 | 11  | 0.006 |
| Family Intrasporangiaceae        | L2 | 0.18 | 0.002 | 21  | 0.011 |
| Family Sphingomonadaceae         | L2 | 0.12 | 0.002 | 11  | 0.011 |
| <i>Nocardioides</i>              | L2 | 0.15 | 0.003 | 22  | 0.015 |
| <i>Marmoricola</i>               | L2 | 0.09 | 0.003 | 10  | 0.015 |
| <i>Propionibacterium</i>         | L2 | 0.39 | 0.004 | 275 | 0.019 |
| <i>Saccharopolyspora</i>         | L2 | 0.09 | 0.006 | 10  | 0.028 |
| <i>Altererythrobacter</i>        | L2 | 0.06 | 0.007 | 5   | 0.032 |
| <i>Georgenia</i>                 | L2 | 0.06 | 0.008 | 5   | 0.035 |
| <i>Piscicoccus</i>               | L2 | 0.09 | 0.011 | 15  | 0.041 |
| <i>Serinicoccus</i>              | L2 | 0.07 | 0.011 | 7   | 0.041 |
| Order JG30-KF-CM45               | L2 | 0.05 | 0.013 | 6   | 0.046 |
| <i>Turicibacter</i>              | L2 | 0.07 | 0.015 | 11  | 0.050 |
| <i>Propioniciclava</i>           | L2 | 0.06 | 0.023 | 11  | 0.071 |
| <i>Massilia</i>                  | L2 | 0.06 | 0.023 | 8   | 0.071 |
| <i>Atopobium</i>                 | L2 | 0.13 | 0.025 | 48  | 0.075 |
| <i>Thermomonas</i>               | L2 | 0.05 | 0.026 | 4   | 0.077 |
| Family Planococcaceae            | L2 | 0.04 | 0.027 | 3   | 0.080 |
| <i>Rubellimicrobium</i>          | L2 | 0.05 | 0.028 | 4   | 0.082 |

|                           |    |      |       |    |       |
|---------------------------|----|------|-------|----|-------|
| Family Rhodobacteraceae   | L2 | 0.05 | 0.032 | 8  | 0.090 |
| <i>Streptomyces</i>       | L2 | 0.05 | 0.033 | 8  | 0.092 |
| <i>Sporosarcina</i>       | L2 | 0.04 | 0.036 | 3  | 0.098 |
| <i>Actinomyces</i>        | L2 | 0.15 | 0.042 | 82 | 0.111 |
| Family Familyl            | L2 | 0.05 | 0.045 | 4  | 0.118 |
| <i>Blastococcus</i>       | L2 | 0.05 | 0.046 | 4  | 0.120 |
| <i>Agrococcus</i>         | L2 | 0.05 | 0.048 | 4  | 0.124 |
| <i>Aureimonas</i>         | L2 | 0.04 | 0.049 | 3  | 0.124 |
| <i>Lysobacter</i>         | L2 | 0.04 | 0.049 | 3  | 0.124 |
| <i>Aquitalea</i>          | L2 | 0.05 | 0.05  | 10 | 0.126 |
| <i>Tessaracoccus</i>      | L2 | 0.05 | 0.051 | 11 | 0.128 |
| <i>Actinopolyspora</i>    | L2 | 0.03 | 0.062 | 4  | 0.150 |
| <i>Peptoniphilus</i>      | L2 | 0.07 | 0.102 | 24 | 0.239 |
| <i>Empedobacter</i>       | L2 | 0.05 | 0.122 | 14 | 0.275 |
| <i>Singulisphaera</i>     | L2 | 0.03 | 0.124 | 6  | 0.278 |
| <i>Yimella</i>            | L2 | 0.02 | 0.131 | 2  | 0.286 |
| <i>Sphingomonas</i>       | L2 | 0.05 | 0.133 | 17 | 0.286 |
| <i>Pandoraea</i>          | L2 | 0.02 | 0.133 | 2  | 0.286 |
| <i>Phycoccus</i>          | L2 | 0.02 | 0.137 | 2  | 0.291 |
| <i>Flavisolibacter</i>    | L2 | 0.02 | 0.138 | 2  | 0.291 |
| <i>Erythrobacter</i>      | L2 | 0.02 | 0.141 | 2  | 0.294 |
| <i>Nitrosomonas</i>       | L2 | 0.02 | 0.141 | 2  | 0.294 |
| <i>Pontibacter</i>        | L2 | 0.03 | 0.145 | 6  | 0.299 |
| Class TA18                | L2 | 0.02 | 0.145 | 2  | 0.299 |
| <i>Pedobacter</i>         | L2 | 0.06 | 0.146 | 20 | 0.299 |
| <i>Bdellovibrio</i>       | L2 | 0.03 | 0.156 | 8  | 0.316 |
| Class Thermomicrobia      | L2 | 0.02 | 0.159 | 2  | 0.321 |
| Mycobacterium             | L2 | 0.02 | 0.166 | 2  | 0.330 |
| Phylum Gracilibacteria    | L2 | 0.02 | 0.168 | 4  | 0.330 |
| Class Thermoleophilia     | L2 | 0.02 | 0.169 | 2  | 0.330 |
| <i>Nocardiopsis</i>       | L2 | 0.02 | 0.17  | 2  | 0.330 |
| <i>Salinimicrobium</i>    | L2 | 0.02 | 0.17  | 2  | 0.330 |
| <i>Acidiphilium</i>       | L2 | 0.02 | 0.171 | 2  | 0.330 |
| <i>Bhargavaea</i>         | L2 | 0.02 | 0.171 | 2  | 0.330 |
| <i>Ornithinococcus</i>    | L2 | 0.02 | 0.173 | 2  | 0.332 |
| Family Micrococcaceae     | L2 | 0.02 | 0.176 | 2  | 0.333 |
| <i>Peptostreptococcus</i> | L2 | 0.05 | 0.178 | 13 | 0.333 |
| <i>Psychrobacillus</i>    | L2 | 0.02 | 0.178 | 2  | 0.333 |
| <i>Defluviicoccus</i>     | L2 | 0.02 | 0.18  | 2  | 0.334 |
| <i>Isoptericola</i>       | L2 | 0.02 | 0.181 | 2  | 0.334 |
| Family 0319-6M6           | L2 | 0.02 | 0.182 | 2  | 0.334 |
| <i>Gaiella</i>            | L2 | 0.02 | 0.182 | 2  | 0.334 |

|                           |    |      |       |    |       |
|---------------------------|----|------|-------|----|-------|
| <i>Mogibacterium</i>      | L2 | 0.02 | 0.183 | 2  | 0.334 |
| <i>Filibacter</i>         | L2 | 0.02 | 0.185 | 2  | 0.334 |
| Family Micromonosporaceae | L2 | 0.02 | 0.187 | 2  | 0.336 |
| <i>Tetrasphaera</i>       | L2 | 0.04 | 0.189 | 11 | 0.338 |
| <i>Citricoccus</i>        | L2 | 0.02 | 0.193 | 2  | 0.342 |
| Class Gitt-GS-136         | L2 | 0.02 | 0.195 | 2  | 0.344 |
| <i>Cellulosilyticum</i>   | L2 | 0.02 | 0.2   | 2  | 0.351 |
| Order Sphingobacteriales  | L2 | 0.02 | 0.208 | 2  | 0.358 |
| <i>Paenibacillus</i>      | L2 | 0.02 | 0.237 | 4  | 0.396 |
| <i>Variovorax</i>         | L2 | 0.06 | 0.24  | 30 | 0.398 |
| <i>Anoxybacillus</i>      | L2 | 0.02 | 0.267 | 4  | 0.427 |
| Order Obscuribacterales   | L2 | 0.03 | 0.295 | 8  | 0.462 |
| Family Cryomorphaceae     | L2 | 0.01 | 0.428 | 2  | 0.626 |
| <i>Aggregatibacter</i>    | L2 | 0.02 | 0.434 | 4  | 0.630 |
| <i>Micromonospora</i>     | L2 | 0.01 | 0.445 | 2  | 0.641 |
| Family MN 122.2a          | L2 | 0.01 | 0.457 | 2  | 0.648 |
| <i>Ezakiella</i>          | L2 | 0.01 | 0.46  | 3  | 0.650 |
| <i>Noviherbaspirillum</i> | L2 | 0.01 | 0.467 | 2  | 0.652 |
| Family JG34-KF-161        | L2 | 0.01 | 0.486 | 1  | 0.671 |
| <i>Ensifer</i>            | L2 | 0.01 | 0.492 | 1  | 0.671 |
| <i>Dermacoccus</i>        | L2 | 0.01 | 0.496 | 1  | 0.671 |
| <i>Xanthomonas</i>        | L2 | 0.01 | 0.499 | 1  | 0.671 |
| <i>Bryocella</i>          | L2 | 0.01 | 0.499 | 2  | 0.671 |
| <i>Propionimicrobium</i>  | L2 | 0.01 | 0.502 | 1  | 0.671 |
| Order Ardenticatenales    | L2 | 0.01 | 0.506 | 1  | 0.671 |
| <i>Sanguibacter</i>       | L2 | 0.01 | 0.511 | 1  | 0.671 |
| Family MIZ14              | L2 | 0.01 | 0.512 | 1  | 0.671 |
| Family Rhodothermaceae    | L2 | 0.01 | 0.512 | 1  | 0.671 |
| <i>Yaniella</i>           | L2 | 0.01 | 0.522 | 1  | 0.682 |
| <i>Finegoldia</i>         | L2 | 0.05 | 0.533 | 25 | 0.692 |
| <i>Roseomonas</i>         | L2 | 0.02 | 0.59  | 8  | 0.757 |
| Family Flavobacteriaceae  | L2 | 0.02 | 0.615 | 10 | 0.767 |
| <i>Alicyclophilus</i>     | L2 | 0.02 | 0.635 | 7  | 0.784 |
| <i>Halomonas</i>          | L2 | 0.03 | 0.637 | 20 | 0.784 |
| <i>Sphaerotilus</i>       | L2 | 0.01 | 0.676 | 4  | 0.815 |
| <i>Oxalophagus</i>        | L2 | 0.01 | 0.692 | 4  | 0.821 |
| <i>Citrobacter</i>        | L2 | 0.02 | 0.718 | 15 | 0.841 |
| <i>Dolosigranulum</i>     | L2 | 0.02 | 0.738 | 14 | 0.850 |
| <i>Undibacterium</i>      | L2 | 0.01 | 0.757 | 2  | 0.864 |
| <i>Collinsella</i>        | L2 | 0.01 | 0.779 | 2  | 0.878 |
| Order PeM15               | L2 | 0.01 | 0.788 | 4  | 0.882 |
| <i>Megamonas</i>          | L2 | 0.01 | 0.79  | 3  | 0.882 |

|                             |    |      |       |     |       |
|-----------------------------|----|------|-------|-----|-------|
| <i>Aquamicrobium</i>        | L2 | 0.01 | 0.804 | 2   | 0.895 |
| Family Bradyrhizobiaceae    | L2 | 0.01 | 0.873 | 2   | 0.952 |
| <i>Microvirgula</i>         | L2 | 0.01 | 0.988 | 8   | 1.000 |
| <i>Haematobacter</i>        | L2 | 0.01 | 0.994 | 5   | 1.000 |
| <i>Solitalea</i>            | L2 | 0.01 | 1     | 2   | 1.000 |
| Family 480-2                | L2 | 0.01 | 1     | 3   | 1.000 |
| <i>Alishewanella</i>        | L2 | 0.01 | 1     | 3   | 1.000 |
| <i>Roseateles</i>           | L2 | 0.01 | 1     | 3   | 1.000 |
| <i>Oribacterium</i>         | L2 | 0.01 | 1     | 2   | 1.000 |
| <i>Dialister</i>            | L2 | 0.00 | 1     | 2   | 1.000 |
| <i>Rhizobacter</i>          | L2 | 0.00 | 1     | 2   | 1.000 |
| <i>Klebsiella</i>           | L3 | 0.40 | 0.001 | 36  | 0.006 |
| <i>Lactobacillus</i>        | L3 | 0.39 | 0.001 | 150 | 0.006 |
| <i>Escherichia/Shigella</i> | L3 | 0.29 | 0.001 | 47  | 0.006 |
| <i>Bacteroides</i>          | L3 | 0.22 | 0.001 | 27  | 0.006 |
| <i>Campylobacter</i>        | L3 | 0.17 | 0.001 | 13  | 0.006 |
| <i>Parabacteroides</i>      | L3 | 0.12 | 0.001 | 13  | 0.006 |
| <i>Paucisalibacillus</i>    | L3 | 0.08 | 0.004 | 6   | 0.019 |
| <i>Sphingobium</i>          | L3 | 0.07 | 0.01  | 9   | 0.041 |
| <i>Ochrobactrum</i>         | L3 | 0.06 | 0.013 | 7   | 0.046 |
| <i>Gluconobacter</i>        | L3 | 0.08 | 0.015 | 7   | 0.050 |
| Order Clostridiales         | L3 | 0.05 | 0.015 | 3   | 0.050 |
| Family Enterobacteriaceae   | L3 | 0.11 | 0.017 | 31  | 0.055 |
| Family Rhizobiaceae         | L3 | 0.03 | 0.023 | 2   | 0.071 |
| <i>Akkermansia</i>          | L3 | 0.05 | 0.024 | 3   | 0.073 |
| <i>Tyzzarella 3</i>         | L3 | 0.03 | 0.03  | 2   | 0.086 |
| <i>Tatumella</i>            | L3 | 0.07 | 0.031 | 9   | 0.088 |
| <i>Proteus</i>              | L3 | 0.03 | 0.035 | 2   | 0.097 |
| <i>Megasphaera</i>          | L3 | 0.05 | 0.036 | 4   | 0.098 |
| Family Lachnospiraceae      | L3 | 0.03 | 0.037 | 2   | 0.099 |
| <i>Prevotella</i>           | L3 | 0.05 | 0.11  | 13  | 0.253 |
| Order Sphingomonadales      | L3 | 0.03 | 0.126 | 4   | 0.281 |
| <i>Lachnoclostridium</i>    | L3 | 0.04 | 0.191 | 9   | 0.340 |
| <i>Enterobacter</i>         | L3 | 0.14 | 0.203 | 75  | 0.353 |
| <i>Solobacterium</i>        | L3 | 0.03 | 0.216 | 5   | 0.370 |
| <i>Nostoc</i>               | L3 | 0.02 | 0.235 | 1   | 0.395 |
| <i>Porphyrobacter</i>       | L3 | 0.02 | 0.238 | 1   | 0.396 |
| <i>Capnocytophaga</i>       | L3 | 0.02 | 0.253 | 2   | 0.412 |
| Family Saprospiraceae       | L3 | 0.02 | 0.277 | 1   | 0.439 |
| <i>Negativicoccus</i>       | L3 | 0.02 | 0.284 | 2   | 0.446 |
| <i>Filifactor</i>           | L3 | 0.02 | 0.309 | 2   | 0.481 |
| <i>Weissella</i>            | L3 | 0.05 | 0.353 | 29  | 0.541 |

|                                    |    |      |       |     |       |
|------------------------------------|----|------|-------|-----|-------|
| <i>Holdemanella</i>                | L3 | 0.01 | 0.365 | 2   | 0.554 |
| <i>Eubacterium</i>                 | L3 | 0.01 | 0.369 | 2   | 0.556 |
| <i>Phylum SHA-109</i>              | L3 | 0.01 | 0.416 | 2   | 0.614 |
| Order Verrucomicrobiales           | L3 | 0.01 | 0.428 | 2   | 0.626 |
| <i>Stenotrophomonas</i>            | L3 | 0.15 | 0.441 | 97  | 0.638 |
| <i>Prevotella</i> 9                | L3 | 0.02 | 0.453 | 5   | 0.646 |
| <i>Parvimonas</i>                  | L3 | 0.02 | 0.469 | 3   | 0.652 |
| <i>Fusobacterium</i>               | L3 | 0.02 | 0.534 | 10  | 0.692 |
| <i>Clostridium sensu stricto</i> 1 | L3 | 0.04 | 0.54  | 32  | 0.698 |
| <i>Actinobacillus</i>              | L3 | 0.01 | 0.688 | 3   | 0.821 |
| <i>Staphylococcus</i>              | L3 | 0.27 | 0.714 | 352 | 0.839 |
| <i>Pelomonas</i>                   | L3 | 0.01 | 0.83  | 5   | 0.919 |
| Family Anaerolineaceae             | L3 | 0.01 | 0.848 | 2   | 0.933 |
| <i>Polynucleobacter</i>            | L3 | 0.01 | 0.866 | 5   | 0.947 |
| <i>Bacillus</i>                    | L3 | 0.06 | 0.9   | 47  | 0.975 |
| <i>Macrococcus</i>                 | L4 | 0.81 | 0.001 | 38  | 0.006 |
| <i>Brachybacterium</i>             | L4 | 0.80 | 0.001 | 67  | 0.006 |
| <i>Aerococcus</i>                  | L4 | 0.68 | 0.001 | 35  | 0.006 |
| <i>Janibacter</i>                  | L4 | 0.66 | 0.001 | 48  | 0.006 |
| <i>Psychrobacter</i>               | L4 | 0.65 | 0.001 | 45  | 0.006 |
| <i>Nesterenkonia</i>               | L4 | 0.62 | 0.001 | 36  | 0.006 |
| <i>Corynebacterium</i> 1           | L4 | 0.60 | 0.001 | 259 | 0.006 |
| <i>Arthrobacter</i>                | L4 | 0.57 | 0.001 | 38  | 0.006 |
| <i>Rhizobium</i>                   | L4 | 0.56 | 0.001 | 37  | 0.006 |
| <i>Brevibacterium</i>              | L4 | 0.56 | 0.001 | 46  | 0.006 |
| <i>Facklamia</i>                   | L4 | 0.53 | 0.001 | 27  | 0.006 |
| <i>Anaerococcus</i>                | L4 | 0.51 | 0.001 | 76  | 0.006 |
| <i>Kocuria</i>                     | L4 | 0.51 | 0.001 | 157 | 0.006 |
| <i>Salinicoccus</i>                | L4 | 0.47 | 0.001 | 23  | 0.006 |
| <i>Jeotgalicoccus</i>              | L4 | 0.46 | 0.001 | 16  | 0.006 |
| <i>Micrococcus</i>                 | L4 | 0.42 | 0.001 | 97  | 0.006 |
| <i>Veillonella</i>                 | L4 | 0.38 | 0.001 | 191 | 0.006 |
| <i>Bifidobacterium</i>             | L4 | 0.34 | 0.001 | 172 | 0.006 |
| <i>Delftia</i>                     | L4 | 0.33 | 0.001 | 29  | 0.006 |
| Family Staphylococcaceae           | L4 | 0.31 | 0.001 | 11  | 0.006 |
| <i>Ornithinimicrobium</i>          | L4 | 0.31 | 0.001 | 53  | 0.006 |
| <i>Microbacterium</i>              | L4 | 0.31 | 0.001 | 60  | 0.006 |
| <i>Granulicatella</i>              | L4 | 0.31 | 0.001 | 72  | 0.006 |
| <i>Kytococcus</i>                  | L4 | 0.30 | 0.001 | 13  | 0.006 |
| <i>Lactococcus</i>                 | L4 | 0.30 | 0.001 | 14  | 0.006 |
| <i>Globicatella</i>                | L4 | 0.30 | 0.001 | 13  | 0.006 |
| <i>Brevundimonas</i>               | L4 | 0.29 | 0.001 | 45  | 0.006 |

|                                     |    |      |       |    |       |
|-------------------------------------|----|------|-------|----|-------|
| <i>Dietzia</i>                      | L4 | 0.29 | 0.001 | 65 | 0.006 |
| <i>Leuconostoc</i>                  | L4 | 0.28 | 0.001 | 30 | 0.006 |
| Phylum Saccharibacteria             | L4 | 0.27 | 0.001 | 38 | 0.006 |
| <i>Olivibacter</i>                  | L4 | 0.20 | 0.001 | 7  | 0.006 |
| <i>Planomicrobium</i>               | L4 | 0.20 | 0.001 | 7  | 0.006 |
| <i>Sphingobacterium</i>             | L4 | 0.17 | 0.001 | 17 | 0.006 |
| <i>Nosocomiicoccus</i>              | L4 | 0.17 | 0.001 | 6  | 0.006 |
| <i>Pediococcus</i>                  | L4 | 0.17 | 0.001 | 6  | 0.006 |
| <i>Enterococcus</i>                 | L4 | 0.15 | 0.001 | 24 | 0.006 |
| <i>Alkalibacterium</i>              | L4 | 0.14 | 0.001 | 8  | 0.006 |
| Family Carnobacteriaceae            | L4 | 0.14 | 0.001 | 5  | 0.006 |
| <i>Solibacillus</i>                 | L4 | 0.14 | 0.001 | 5  | 0.006 |
| <i>Raoultella</i>                   | L4 | 0.12 | 0.001 | 9  | 0.006 |
| <i>Aliicoccus</i>                   | L4 | 0.11 | 0.001 | 4  | 0.006 |
| Order Micrococcales                 | L4 | 0.11 | 0.001 | 6  | 0.006 |
| <i>Demequina</i>                    | L4 | 0.09 | 0.001 | 3  | 0.006 |
| <i>Duganella</i>                    | L4 | 0.09 | 0.001 | 3  | 0.006 |
| <i>Deinococcus</i>                  | L4 | 0.15 | 0.002 | 17 | 0.011 |
| <i>Acetobacter</i>                  | L4 | 0.12 | 0.002 | 8  | 0.011 |
| <i>Porphyromonas</i>                | L4 | 0.11 | 0.002 | 16 | 0.011 |
| <i>Clostridium sensu stricto</i> 12 | L4 | 0.10 | 0.002 | 6  | 0.011 |
| <i>Luteimonas</i>                   | L4 | 0.10 | 0.003 | 10 | 0.015 |
| <i>Rahnella</i>                     | L4 | 0.09 | 0.003 | 3  | 0.015 |
| <i>Comamonas</i>                    | L4 | 0.12 | 0.004 | 22 | 0.019 |
| <i>Lautropia</i>                    | L4 | 0.08 | 0.004 | 5  | 0.019 |
| <i>Promicromonospora</i>            | L4 | 0.06 | 0.006 | 2  | 0.028 |
| <i>Leifsonia</i>                    | L4 | 0.06 | 0.008 | 2  | 0.035 |
| <i>Zhihengliuella</i>               | L4 | 0.06 | 0.008 | 2  | 0.035 |
| <i>Exiguobacterium</i>              | L4 | 0.07 | 0.009 | 7  | 0.039 |
| <i>Dysgonomonas</i>                 | L4 | 0.06 | 0.01  | 2  | 0.041 |
| Family Brucellaceae                 | L4 | 0.06 | 0.01  | 2  | 0.041 |
| <i>Paenalcaligenes</i>              | L4 | 0.06 | 0.01  | 2  | 0.041 |
| <i>Pseudoalteromonas</i>            | L4 | 0.06 | 0.01  | 2  | 0.041 |
| <i>Pseudobutyrvibrio</i>            | L4 | 0.06 | 0.01  | 2  | 0.041 |
| Family Aerococcaceae                | L4 | 0.06 | 0.011 | 2  | 0.041 |
| Family Dermabacteraceae             | L4 | 0.06 | 0.011 | 2  | 0.041 |
| <i>Fastidiosipila</i>               | L4 | 0.06 | 0.011 | 2  | 0.041 |
| <i>Oceanitalea</i>                  | L4 | 0.06 | 0.011 | 2  | 0.041 |
| <i>Salana</i>                       | L4 | 0.06 | 0.011 | 2  | 0.041 |
| <i>Curtobacterium</i>               | L4 | 0.05 | 0.011 | 3  | 0.041 |
| <i>Marinococcus</i>                 | L4 | 0.06 | 0.012 | 2  | 0.044 |
| <i>Marinilactibacillus</i>          | L4 | 0.06 | 0.013 | 2  | 0.046 |



|                               |    |      |       |     |       |
|-------------------------------|----|------|-------|-----|-------|
| <i>Planococcus</i>            | L4 | 0.06 | 0.013 | 2   | 0.046 |
| <i>Tropicimonas</i>           | L4 | 0.06 | 0.013 | 2   | 0.046 |
| <i>Actinotalea</i>            | L4 | 0.06 | 0.015 | 2   | 0.050 |
| <i>Neisseria</i>              | L4 | 0.11 | 0.016 | 35  | 0.053 |
| <i>Methylobacterium</i>       | L4 | 0.08 | 0.016 | 17  | 0.053 |
| <i>Peptoclostridium</i>       | L4 | 0.07 | 0.017 | 11  | 0.055 |
| <i>Flaviflexus</i>            | L4 | 0.06 | 0.017 | 2   | 0.055 |
| <i>Chryseomicrobium</i>       | L4 | 0.06 | 0.029 | 12  | 0.084 |
| <i>Erysipelatoclostridium</i> | L4 | 0.05 | 0.037 | 7   | 0.099 |
| <i>Alloprevotella</i>         | L4 | 0.08 | 0.053 | 22  | 0.132 |
| <i>Aquabacterium</i>          | L4 | 0.04 | 0.055 | 4   | 0.136 |
| <i>Knoellia</i>               | L4 | 0.04 | 0.061 | 8   | 0.149 |
| <i>Leptotrichia</i>           | L4 | 0.04 | 0.067 | 5   | 0.161 |
| <i>Atopostipes</i>            | L4 | 0.03 | 0.071 | 4   | 0.170 |
| <i>Acinetobacter</i>          | L4 | 0.26 | 0.077 | 156 | 0.183 |
| <i>Gardnerella</i>            | L4 | 0.06 | 0.107 | 20  | 0.247 |
| <i>Ignavigranum</i>           | L4 | 0.03 | 0.111 | 4   | 0.253 |
| <i>Bergeyella</i>             | L4 | 0.07 | 0.114 | 22  | 0.259 |
| <i>Prevotella 7</i>           | L4 | 0.06 | 0.178 | 26  | 0.333 |
| <i>Agromyces</i>              | L4 | 0.03 | 0.184 | 5   | 0.334 |
| <i>Moraxella</i>              | L4 | 0.12 | 0.203 | 66  | 0.353 |
| <i>Pseudonocardia</i>         | L4 | 0.02 | 0.245 | 3   | 0.404 |
| <i>Devosia</i>                | L4 | 0.02 | 0.25  | 6   | 0.409 |
| <i>Corynebacterium</i>        | L4 | 0.04 | 0.366 | 15  | 0.554 |
| Family Neisseriaceae          | L4 | 0.05 | 0.452 | 33  | 0.646 |
| <i>Intestinibacter</i>        | L4 | 0.04 | 0.504 | 26  | 0.671 |
| <i>Abiotrophia</i>            | L4 | 0.02 | 0.506 | 5   | 0.671 |
| Family Corynebacteriaceae     | L4 | 0.03 | 0.553 | 17  | 0.712 |
| <i>Chryseobacterium</i>       | L4 | 0.11 | 0.76  | 72  | 0.865 |
| Family Halomonadaceae         | L4 | 0.01 | 0.818 | 7   | 0.908 |

**Table S5. Indicator taxa of the infant microbial enterotypes**

| Taxa                               | Microbial enterotype | indval | <i>p</i> | frequency | FDR <i>p</i> |
|------------------------------------|----------------------|--------|----------|-----------|--------------|
| <i>Bacteroides</i>                 | E1                   | 0.82   | 0.001    | 262       | 0.017        |
| <i>Lachnoclostridium</i>           | E1                   | 0.56   | 0.001    | 148       | 0.017        |
| <i>Clostridium sensu stricto</i> 1 | E1                   | 0.44   | 0.001    | 128       | 0.017        |
| <i>Parabacteroides</i>             | E1                   | 0.32   | 0.001    | 88        | 0.017        |
| <i>Erysipelatoclostridium</i>      | E1                   | 0.27   | 0.001    | 68        | 0.017        |
| <i>Enterococcus</i>                | E1                   | 0.45   | 0.002    | 188       | 0.023        |
| Family Enterobacteriaceae          | E1                   | 0.20   | 0.002    | 67        | 0.023        |
| <i>Citrobacter</i>                 | E1                   | 0.16   | 0.002    | 38        | 0.023        |
| <i>Peptoclostridium</i>            | E1                   | 0.15   | 0.002    | 35        | 0.023        |
| <i>Ruminiclostridium</i> 5         | E1                   | 0.10   | 0.002    | 26        | 0.023        |
| Erysipelotrichaceae Incertae Sedis | E1                   | 0.09   | 0.002    | 20        | 0.023        |
| <i>Enterobacter</i>                | E1                   | 0.24   | 0.003    | 77        | 0.031        |
| <i>Escherichia/Shigella</i>        | E1                   | 0.56   | 0.004    | 329       | 0.039        |
| <i>Flavonifractor</i>              | E1                   | 0.09   | 0.005    | 23        | 0.045        |
| <i>Alistipes</i>                   | E1                   | 0.06   | 0.006    | 13        | 0.053        |
| <i>Blautia</i>                     | E1                   | 0.11   | 0.009    | 26        | 0.072        |
| <i>Dorea</i>                       | E1                   | 0.07   | 0.011    | 17        | 0.085        |
| <i>Phascolarctobacterium</i>       | E1                   | 0.05   | 0.015    | 10        | 0.113        |
| <i>Haemophilus</i>                 | E1                   | 0.17   | 0.022    | 62        | 0.162        |
| Family Ruminococcaceae             | E1                   | 0.06   | 0.024    | 16        | 0.172        |
| <i>Hungatella</i>                  | E1                   | 0.04   | 0.031    | 8         | 0.216        |
| <i>Raoultella</i>                  | E1                   | 0.09   | 0.04     | 31        | 0.259        |
| <i>Anaeroglobus</i>                | E1                   | 0.03   | 0.04     | 7         | 0.259        |
| <i>Tyzzerella</i> 4                | E1                   | 0.04   | 0.053    | 10        | 0.328        |
| <i>Faecalibacterium</i>            | E1                   | 0.03   | 0.066    | 6         | 0.396        |
| <i>Negativicoccus</i>              | E1                   | 0.11   | 0.108    | 46        | 0.554        |
| <i>Anaerostipes</i>                | E1                   | 0.03   | 0.108    | 8         | 0.554        |
| <i>Morganella</i>                  | E1                   | 0.04   | 0.115    | 11        | 0.579        |
| <i>Bilophila</i>                   | E1                   | 0.03   | 0.124    | 10        | 0.613        |
| <i>Varibaculum</i>                 | E1                   | 0.04   | 0.133    | 11        | 0.646        |
| <i>Akkermansia</i>                 | E1                   | 0.06   | 0.139    | 19        | 0.652        |
| <i>Dysgonomonas</i>                | E1                   | 0.05   | 0.139    | 14        | 0.652        |
| <i>Sutterella</i>                  | E1                   | 0.10   | 0.143    | 35        | 0.659        |
| <i>Succinivibrio</i>               | E1                   | 0.02   | 0.185    | 4         | 0.733        |
| <i>Butyricimonas</i>               | E1                   | 0.02   | 0.186    | 4         | 0.733        |
| <i>Megasphaera</i>                 | E1                   | 0.13   | 0.193    | 64        | 0.739        |
| <i>Lactococcus</i>                 | E1                   | 0.06   | 0.193    | 23        | 0.739        |
| <i>Eggerthella</i>                 | E1                   | 0.04   | 0.207    | 17        | 0.782        |
| <i>Terrisporobacter</i>            | E1                   | 0.01   | 0.231    | 3         | 0.861        |

|                                                       |    |      |       |    |       |
|-------------------------------------------------------|----|------|-------|----|-------|
| <i>Subdoligranulum</i>                                | E1 | 0.01 | 0.236 | 3  | 0.867 |
| <i>Catabacter</i>                                     | E1 | 0.01 | 0.25  | 3  | 0.894 |
| [ <i>Eubacterium</i> ] <i>hallii</i> group            | E1 | 0.01 | 0.255 | 3  | 0.894 |
| Family Bacteroidales S24-7 group                      | E1 | 0.01 | 0.261 | 3  | 0.894 |
| <i>Parascardovia</i>                                  | E1 | 0.01 | 0.262 | 3  | 0.894 |
| <i>Epulopiscium</i>                                   | E1 | 0.01 | 0.263 | 3  | 0.894 |
| <i>Eubacterium</i>                                    | E1 | 0.04 | 0.347 | 15 | 0.993 |
| <i>Intestinibacter</i>                                | E1 | 0.03 | 0.355 | 15 | 0.993 |
| [ <i>Eubacterium</i> ] <i>coprostanoligenes</i> group | E1 | 0.01 | 0.494 | 2  | 0.993 |
| Lachnospiraceae Incertae Sedis                        | E1 | 0.01 | 0.494 | 2  | 0.993 |
| <i>Microbacterium</i>                                 | E1 | 0.01 | 0.502 | 2  | 0.993 |
| <i>Anaerotruncus</i>                                  | E1 | 0.01 | 0.504 | 2  | 0.993 |
| <i>Barnesiella</i>                                    | E1 | 0.01 | 0.507 | 2  | 0.993 |
| <i>Gordonibacter</i>                                  | E1 | 0.01 | 0.507 | 2  | 0.993 |
| <i>Aeromonas</i>                                      | E1 | 0.01 | 0.51  | 2  | 0.993 |
| Ruminococcaceae UCG-014                               | E1 | 0.01 | 0.513 | 2  | 0.993 |
| Christensenellaceae R-7 group                         | E1 | 0.01 | 0.515 | 2  | 0.993 |
| <i>Providencia</i>                                    | E1 | 0.01 | 0.517 | 2  | 0.993 |
| <i>Acidovorax</i>                                     | E1 | 0.01 | 0.521 | 2  | 0.993 |
| <i>Comamonas</i>                                      | E1 | 0.01 | 0.521 | 2  | 0.993 |
| <i>Hyphomicrobium</i>                                 | E1 | 0.01 | 0.521 | 2  | 0.993 |
| <i>Salmonella</i>                                     | E1 | 0.01 | 0.522 | 2  | 0.993 |
| <i>Syntrophococcus</i>                                | E1 | 0.01 | 0.535 | 2  | 1.000 |
| <i>Odoribacter</i>                                    | E1 | 0.01 | 0.553 | 5  | 1.000 |
| <i>Collinsella</i>                                    | E1 | 0.02 | 0.568 | 9  | 1.000 |
| <i>Moraxella</i>                                      | E1 | 0.01 | 0.612 | 3  | 1.000 |
| Lachnospiraceae UCG-004                               | E1 | 0.01 | 0.693 | 7  | 1.000 |
| <i>Propionibacterium</i>                              | E1 | 0.05 | 0.699 | 26 | 1.000 |
| <i>Leuconostoc</i>                                    | E1 | 0.03 | 0.699 | 18 | 1.000 |
| <i>Parasutterella</i>                                 | E1 | 0.01 | 0.706 | 4  | 1.000 |
| <i>Prevotella</i> 9                                   | E1 | 0.03 | 0.708 | 17 | 1.000 |
| <i>Acidocella</i>                                     | E1 | 0.01 | 0.742 | 3  | 1.000 |
| <i>Scardovia</i>                                      | E1 | 0.01 | 0.747 | 6  | 1.000 |
| <i>Fusobacterium</i>                                  | E1 | 0.04 | 0.754 | 22 | 1.000 |
| <i>Acinetobacter</i>                                  | E1 | 0.04 | 0.755 | 21 | 1.000 |
| <i>Catenibacterium</i>                                | E1 | 0.02 | 0.765 | 7  | 1.000 |
| <i>Clostridium sensu stricto</i> 13                   | E1 | 0.01 | 0.765 | 3  | 1.000 |
| <i>Aerococcus</i>                                     | E1 | 0.01 | 0.772 | 5  | 1.000 |
| <i>Trabulsiella</i>                                   | E1 | 0.01 | 0.81  | 6  | 1.000 |
| Family Clostridiaceae 1                               | E1 | 0.01 | 0.856 | 3  | 1.000 |
| <i>Paucisalibacillus</i>                              | E1 | 0.01 | 0.857 | 5  | 1.000 |
| <i>Actinobacillus</i>                                 | E1 | 0.00 | 0.858 | 3  | 1.000 |

|                                     |    |      |       |    |       |
|-------------------------------------|----|------|-------|----|-------|
| <i>Lactonifactor</i>                | E1 | 0.01 | 0.879 | 4  | 1.000 |
| <i>Finegoldia</i>                   | E1 | 0.07 | 0.884 | 38 | 1.000 |
| <i>Solobacterium</i>                | E1 | 0.01 | 0.925 | 5  | 1.000 |
| Family Bifidobacteriaceae           | E1 | 0.01 | 0.933 | 4  | 1.000 |
| <i>Peptoniphilus</i>                | E1 | 0.06 | 0.958 | 43 | 1.000 |
| <i>Anaerococcus</i>                 | E1 | 0.05 | 0.959 | 37 | 1.000 |
| <i>Kluyvera</i>                     | E1 | 0.02 | 0.973 | 12 | 1.000 |
| <i>Aerosphaera</i>                  | E1 | 0.00 | 1     | 1  | 1.000 |
| <i>Aggregatibacter</i>              | E1 | 0.00 | 1     | 1  | 1.000 |
| <i>Ameyamaea</i>                    | E1 | 0.00 | 1     | 1  | 1.000 |
| <i>Anaerosalibacter</i>             | E1 | 0.00 | 1     | 1  | 1.000 |
| <i>Anaerosporobacter</i>            | E1 | 0.00 | 1     | 1  | 1.000 |
| <i>Aquabacterium</i>                | E1 | 0.00 | 1     | 1  | 1.000 |
| <i>Bradyrhizobium</i>               | E1 | 0.00 | 1     | 1  | 1.000 |
| <i>Caulobacter</i>                  | E1 | 0.00 | 1     | 1  | 1.000 |
| Class Actinobacteria                | E1 | 0.00 | 1     | 1  | 1.000 |
| Class Alphaproteobacteria           | E1 | 0.00 | 1     | 1  | 1.000 |
| Class Mollicutes                    | E1 | 0.00 | 1     | 1  | 1.000 |
| <i>Clostridium sensu stricto</i> 18 | E1 | 0.00 | 1     | 1  | 1.000 |
| <i>Clostridium sensu stricto</i> 2  | E1 | 0.00 | 1     | 1  | 1.000 |
| <i>Clostridium sensu stricto</i> 9  | E1 | 0.00 | 1     | 1  | 1.000 |
| <i>Coprobacter</i>                  | E1 | 0.00 | 1     | 1  | 1.000 |
| <i>Devosia</i>                      | E1 | 0.00 | 1     | 1  | 1.000 |
| <i>Dyella</i>                       | E1 | 0.00 | 1     | 1  | 1.000 |
| Erysipelotrichaceae UCG-006         | E1 | 0.00 | 1     | 1  | 1.000 |
| <i>Facklamia</i>                    | E1 | 0.00 | 1     | 1  | 1.000 |
| Family 11-24                        | E1 | 0.00 | 1     | 1  | 1.000 |
| Family Bacteroidales RF16 group     | E1 | 0.00 | 1     | 1  | 1.000 |
| Family Enterococcaceae              | E1 | 0.00 | 1     | 1  | 1.000 |
| Family Hyphomicrobiaceae            | E1 | 0.00 | 1     | 1  | 1.000 |
| Family Leptotrichiaceae             | E1 | 0.00 | 1     | 1  | 1.000 |
| Family Planococcaceae               | E1 | 0.00 | 1     | 1  | 1.000 |
| Family Pseudomonadaceae             | E1 | 0.00 | 1     | 1  | 1.000 |
| Family Rhodobacteraceae             | E1 | 0.00 | 1     | 1  | 1.000 |
| Family Sphingomonadaceae            | E1 | 0.00 | 1     | 1  | 1.000 |
| <i>Flavisolibacter</i>              | E1 | 0.00 | 1     | 1  | 1.000 |
| <i>Geobacillus</i>                  | E1 | 0.00 | 1     | 1  | 1.000 |
| <i>Gluconobacter</i>                | E1 | 0.00 | 1     | 1  | 1.000 |
| <i>Helicobacter</i>                 | E1 | 0.00 | 1     | 1  | 1.000 |
| <i>Intestinimonas</i>               | E1 | 0.00 | 1     | 1  | 1.000 |
| <i>Johnsonella</i>                  | E1 | 0.00 | 1     | 1  | 1.000 |
| <i>Kingella</i>                     | E1 | 0.00 | 1     | 1  | 1.000 |

|                                                 |    |      |   |   |       |
|-------------------------------------------------|----|------|---|---|-------|
| <i>Kocuria</i>                                  | E1 | 0.00 | 1 | 1 | 1.000 |
| <i>Lachnoclostridium</i> 5                      | E1 | 0.00 | 1 | 1 | 1.000 |
| <i>Leptotrichia</i>                             | E1 | 0.00 | 1 | 1 | 1.000 |
| <i>Massilia</i>                                 | E1 | 0.00 | 1 | 1 | 1.000 |
| <i>Megamonas</i>                                | E1 | 0.00 | 1 | 1 | 1.000 |
| <i>Novosphingobium</i>                          | E1 | 0.00 | 1 | 1 | 1.000 |
| Order Gastranaerophilales                       | E1 | 0.00 | 1 | 1 | 1.000 |
| Order Micrococcales                             | E1 | 0.00 | 1 | 1 | 1.000 |
| Order Mollicutes RF9                            | E1 | 0.00 | 1 | 1 | 1.000 |
| <i>Oribacterium</i>                             | E1 | 0.00 | 1 | 1 | 1.000 |
| <i>Paludibacter</i>                             | E1 | 0.00 | 1 | 1 | 1.000 |
| <i>Paraprevotella</i>                           | E1 | 0.00 | 1 | 1 | 1.000 |
| <i>Patulibacter</i>                             | E1 | 0.00 | 1 | 1 | 1.000 |
| <i>Pediococcus</i>                              | E1 | 0.00 | 1 | 1 | 1.000 |
| Phylum Bacteroidetes                            | E1 | 0.00 | 1 | 1 | 1.000 |
| Phylum SM2F11                                   | E1 | 0.00 | 1 | 1 | 1.000 |
| Phylum TM6                                      | E1 | 0.00 | 1 | 1 | 1.000 |
| <i>Pigmentiphaga</i>                            | E1 | 0.00 | 1 | 1 | 1.000 |
| <i>Polynucleobacter</i>                         | E1 | 0.00 | 1 | 1 | 1.000 |
| Prevotellaceae NK3B31 group                     | E1 | 0.00 | 1 | 1 | 1.000 |
| <i>Pseudoclavibacter</i>                        | E1 | 0.00 | 1 | 1 | 1.000 |
| <i>Roseomonas</i>                               | E1 | 0.00 | 1 | 1 | 1.000 |
| <i>Ruminiclostridium</i>                        | E1 | 0.00 | 1 | 1 | 1.000 |
| Ruminococcaceae UCG-004                         | E1 | 0.00 | 1 | 1 | 1.000 |
| Ruminococcaceae UCG-005                         | E1 | 0.00 | 1 | 1 | 1.000 |
| <i>Sarcina</i>                                  | E1 | 0.00 | 1 | 1 | 1.000 |
| <i>Selenomonas</i> 3                            | E1 | 0.00 | 1 | 1 | 1.000 |
| <i>Streptomyces</i>                             | E1 | 0.00 | 1 | 1 | 1.000 |
| <i>Tepidimicrobium</i>                          | E1 | 0.00 | 1 | 1 | 1.000 |
| <i>Thalassospira</i>                            | E1 | 0.00 | 1 | 1 | 1.000 |
| <i>Trueperella</i>                              | E1 | 0.00 | 1 | 1 | 1.000 |
| <i>Tyzzerella</i>                               | E1 | 0.00 | 1 | 1 | 1.000 |
| [ <i>Ruminococcus</i> ] <i>gauvreauii</i> group | E1 | 0.00 | 1 | 2 | 1.000 |
| <i>Brevibacterium</i>                           | E1 | 0.00 | 1 | 2 | 1.000 |
| <i>Brevundimonas</i>                            | E1 | 0.00 | 1 | 2 | 1.000 |
| <i>Mogibacterium</i>                            | E1 | 0.00 | 1 | 4 | 1.000 |
| <i>Rhizobium</i>                                | E1 | 0.00 | 1 | 2 | 1.000 |
| [ <i>Eubacterium</i> ] <i>nodatum</i> group     | E1 | 0.00 | 1 | 3 | 1.000 |
| <i>Alloscardovia</i>                            | E1 | 0.00 | 1 | 2 | 1.000 |
| Family Prevotellaceae                           | E1 | 0.00 | 1 | 4 | 1.000 |
| Family Methylophilaceae                         | E1 | 0.00 | 1 | 2 | 1.000 |
| <i>Murdochella</i>                              | E1 | 0.00 | 1 | 2 | 1.000 |

|                             |    |      |       |     |       |
|-----------------------------|----|------|-------|-----|-------|
| <i>Bacillus</i>             | E1 | 0.00 | 1     | 2   | 1.000 |
| <i>Macrococcus</i>          | E1 | 0.00 | 1     | 2   | 1.000 |
| <i>Fusicatenibacter</i>     | E1 | 0.00 | 1     | 2   | 1.000 |
| <i>Desulfovibrio</i>        | E1 | 0.00 | 1     | 2   | 1.000 |
| <i>Streptococcus</i>        | E2 | 0.81 | 0.001 | 352 | 0.017 |
| <i>Bifidobacterium</i>      | E2 | 0.66 | 0.001 | 318 | 0.017 |
| <i>Lactobacillus</i>        | E2 | 0.63 | 0.001 | 295 | 0.017 |
| <i>Gemella</i>              | E2 | 0.60 | 0.001 | 138 | 0.017 |
| <i>Rothia</i>               | E2 | 0.53 | 0.001 | 135 | 0.017 |
| <i>Staphylococcus</i>       | E2 | 0.52 | 0.001 | 223 | 0.017 |
| <i>Atopobium</i>            | E2 | 0.31 | 0.001 | 68  | 0.017 |
| <i>Granulicatella</i>       | E2 | 0.30 | 0.001 | 59  | 0.017 |
| <i>Prevotella</i>           | E2 | 0.27 | 0.001 | 75  | 0.017 |
| <i>Tyzzerella</i> 3         | E2 | 0.22 | 0.001 | 34  | 0.017 |
| Order Lactobacillales       | E2 | 0.09 | 0.001 | 13  | 0.017 |
| <i>Corynebacterium</i> 1    | E2 | 0.21 | 0.002 | 72  | 0.023 |
| <i>Gardnerella</i>          | E2 | 0.06 | 0.002 | 10  | 0.023 |
| <i>Actinomyces</i>          | E2 | 0.28 | 0.003 | 117 | 0.031 |
| <i>Porphyromonas</i>        | E2 | 0.10 | 0.004 | 24  | 0.039 |
| <i>Dolosigranulum</i>       | E2 | 0.05 | 0.005 | 9   | 0.045 |
| <i>Lachnoanaerobaculum</i>  | E2 | 0.04 | 0.007 | 9   | 0.060 |
| <i>Peptostreptococcus</i>   | E2 | 0.11 | 0.009 | 29  | 0.072 |
| <i>Fastidiosipila</i>       | E2 | 0.03 | 0.04  | 4   | 0.259 |
| <i>Ezakiella</i>            | E2 | 0.08 | 0.044 | 25  | 0.278 |
| <i>Candidatus Rhodoluna</i> | E2 | 0.02 | 0.067 | 3   | 0.396 |
| Phylum Firmicutes           | E2 | 0.02 | 0.07  | 3   | 0.402 |
| Family Coriobacteriaceae    | E2 | 0.03 | 0.071 | 7   | 0.402 |
| <i>Mitsuokella</i>          | E2 | 0.02 | 0.077 | 3   | 0.427 |
| Class Bacilli               | E2 | 0.03 | 0.085 | 6   | 0.462 |
| <i>Prevotella</i> 6         | E2 | 0.04 | 0.091 | 12  | 0.485 |
| <i>Flavobacterium</i>       | E2 | 0.03 | 0.148 | 8   | 0.671 |
| <i>Pseudomonas</i>          | E2 | 0.02 | 0.156 | 5   | 0.696 |
| <i>Thermomonas</i>          | E2 | 0.01 | 0.167 | 2   | 0.709 |
| <i>Holdemanella</i>         | E2 | 0.06 | 0.168 | 22  | 0.709 |
| <i>Weissella</i>            | E2 | 0.06 | 0.171 | 19  | 0.709 |
| <i>Paracoccus</i>           | E2 | 0.01 | 0.172 | 2   | 0.709 |
| <i>Sphingomonas</i>         | E2 | 0.01 | 0.172 | 2   | 0.709 |
| <i>Sphingobacterium</i>     | E2 | 0.01 | 0.18  | 2   | 0.731 |
| <i>Olsenella</i>            | E2 | 0.02 | 0.245 | 7   | 0.889 |
| <i>Senegalimassilia</i>     | E2 | 0.02 | 0.28  | 5   | 0.940 |
| Family Flavobacteriaceae    | E2 | 0.01 | 0.308 | 4   | 0.993 |
| <i>Psychrobacter</i>        | E2 | 0.01 | 0.311 | 4   | 0.993 |

|                                   |    |      |       |     |       |
|-----------------------------------|----|------|-------|-----|-------|
| <i>Proteus</i>                    | E2 | 0.04 | 0.352 | 16  | 0.993 |
| <i>Allisonella</i>                | E2 | 0.01 | 0.355 | 3   | 0.993 |
| <i>Klebsiella</i>                 | E2 | 0.19 | 0.374 | 114 | 0.993 |
| <i>Stenotrophomonas</i>           | E2 | 0.03 | 0.384 | 14  | 0.993 |
| <i>Sneathia</i>                   | E2 | 0.01 | 0.395 | 1   | 0.993 |
| <i>Bdellovibrio</i>               | E2 | 0.01 | 0.4   | 1   | 0.993 |
| <i>Rhodococcus</i>                | E2 | 0.01 | 0.407 | 1   | 0.993 |
| <i>Abiotrophia</i>                | E2 | 0.01 | 0.408 | 1   | 0.993 |
| <i>Ottowia</i>                    | E2 | 0.01 | 0.409 | 1   | 0.993 |
| <i>Taibaiella</i>                 | E2 | 0.01 | 0.409 | 1   | 0.993 |
| <i>Fluviicola</i>                 | E2 | 0.01 | 0.411 | 1   | 0.993 |
| <i>Sphingopyxis</i>               | E2 | 0.01 | 0.411 | 1   | 0.993 |
| <i>Limnohabitans</i>              | E2 | 0.01 | 0.417 | 1   | 0.993 |
| <i>Candidatus Planktophila</i>    | E2 | 0.01 | 0.418 | 1   | 0.993 |
| <i>Olivibacter</i>                | E2 | 0.01 | 0.418 | 1   | 0.993 |
| <i>Parapedobacter</i>             | E2 | 0.01 | 0.418 | 1   | 0.993 |
| <i>[Eubacterium] brachy</i> group | E2 | 0.01 | 0.419 | 1   | 0.993 |
| <i>Methylobacterium</i>           | E2 | 0.01 | 0.42  | 1   | 0.993 |
| Family Family XIII                | E2 | 0.01 | 0.426 | 1   | 0.993 |
| <i>Haloferula</i>                 | E2 | 0.01 | 0.426 | 1   | 0.993 |
| <i>Ochrobactrum</i>               | E2 | 0.01 | 0.426 | 1   | 0.993 |
| <i>Azorhizobium</i>               | E2 | 0.01 | 0.427 | 1   | 0.993 |
| <i>Pseudacidovorax</i>            | E2 | 0.01 | 0.427 | 1   | 0.993 |
| <i>Kurthia</i>                    | E2 | 0.01 | 0.428 | 1   | 0.993 |
| <i>Achromobacter</i>              | E2 | 0.01 | 0.429 | 1   | 0.993 |
| <i>Brachybacterium</i>            | E2 | 0.01 | 0.429 | 1   | 0.993 |
| Family Microbacteriaceae          | E2 | 0.01 | 0.43  | 1   | 0.993 |
| <i>Robinsoniella</i>              | E2 | 0.01 | 0.43  | 1   | 0.993 |
| <i>Cruoricaptor</i>               | E2 | 0.01 | 0.432 | 1   | 0.993 |
| Class Clostridia                  | E2 | 0.01 | 0.433 | 1   | 0.993 |
| Family Peptostreptococcaceae      | E2 | 0.02 | 0.438 | 5   | 0.993 |
| <i>Niabella</i>                   | E2 | 0.01 | 0.439 | 1   | 0.993 |
| <i>Weeksella</i>                  | E2 | 0.01 | 0.439 | 1   | 0.993 |
| <i>Bordetella</i>                 | E2 | 0.01 | 0.441 | 1   | 0.993 |
| <i>Rhodopseudomonas</i>           | E2 | 0.01 | 0.441 | 1   | 0.993 |
| <i>Arthrobacter</i>               | E2 | 0.01 | 0.443 | 1   | 0.993 |
| Class WCHB1-32                    | E2 | 0.01 | 0.451 | 1   | 0.993 |
| <i>Romboutsia</i>                 | E2 | 0.01 | 0.456 | 1   | 0.993 |
| <i>Hafnia</i>                     | E2 | 0.01 | 0.468 | 3   | 0.993 |
| <i>Prevotella 7</i>               | E2 | 0.02 | 0.469 | 6   | 0.993 |
| Class Gammaproteobacteria         | E2 | 0.01 | 0.477 | 3   | 0.993 |
| Order Bacteroidales               | E2 | 0.02 | 0.481 | 7   | 0.993 |

|                           |    |      |       |     |       |
|---------------------------|----|------|-------|-----|-------|
| Order Clostridiales       | E2 | 0.06 | 0.49  | 26  | 0.993 |
| <i>Acetobacter</i>        | E2 | 0.03 | 0.518 | 11  | 0.993 |
| <i>Delftia</i>            | E2 | 0.02 | 0.588 | 7   | 1.000 |
| Family Corynebacteriaceae | E2 | 0.02 | 0.598 | 10  | 1.000 |
| <i>Prevotella 2</i>       | E2 | 0.01 | 0.613 | 7   | 1.000 |
| Phylum Saccharibacteria   | E2 | 0.04 | 0.642 | 19  | 1.000 |
| <i>Dermabacter</i>        | E2 | 0.01 | 0.665 | 4   | 1.000 |
| <i>Dialister</i>          | E2 | 0.08 | 0.732 | 46  | 1.000 |
| <i>Parvimonas</i>         | E2 | 0.03 | 0.734 | 15  | 1.000 |
| <i>Pseudarcicella</i>     | E2 | 0.01 | 0.743 | 2   | 1.000 |
| <i>Alloprevotella</i>     | E2 | 0.00 | 0.749 | 2   | 1.000 |
| Phylum Proteobacteria     | E2 | 0.01 | 0.754 | 2   | 1.000 |
| <i>Ureaplasma</i>         | E2 | 0.01 | 0.763 | 2   | 1.000 |
| <i>Mobiluncus</i>         | E2 | 0.00 | 0.763 | 2   | 1.000 |
| <i>Propionimicrobium</i>  | E2 | 0.01 | 0.781 | 2   | 1.000 |
| <i>Acidaminococcus</i>    | E2 | 0.02 | 0.814 | 8   | 1.000 |
| <i>Peptococcus</i>        | E2 | 0.01 | 0.881 | 4   | 1.000 |
| <i>Campylobacter</i>      | E2 | 0.07 | 0.929 | 41  | 1.000 |
| <i>Veillonella</i>        | E2 | 0.45 | 0.96  | 323 | 1.000 |
| <i>Chryseobacterium</i>   | E2 | 0.01 | 0.961 | 6   | 1.000 |
| Family Lachnospiraceae    | E2 | 0.06 | 0.991 | 42  | 1.000 |
| <i>Neisseria</i>          | E2 | 0.00 | 1     | 4   | 1.000 |
| Family Veillonellaceae    | E2 | 0.00 | 1     | 3   | 1.000 |



**Table S6. HMO concentrations and ratios among microbial lactotypes**

| HMO                            | Microbial lactotype       |                           |                           |                            | <i>p</i> | FDR <i>p</i> |
|--------------------------------|---------------------------|---------------------------|---------------------------|----------------------------|----------|--------------|
|                                | L1                        | L2                        | L3                        | L4                         |          |              |
| 2'FL                           | 4745±3294 <sup>a</sup>    | 3315±2742 <sup>b</sup>    | 3031±3360 <sup>bc</sup>   | 2134±2444 <sup>c</sup>     | 1.33E-07 | 1.13E-06     |
| 3FL                            | 212±200                   | 153±127                   | 174±194                   | 200±146                    | 6.43E-02 | 7.54E-02     |
| LNnT                           | 825±489 <sup>a</sup>      | 1006±543 <sup>b</sup>     | 843±618 <sup>a</sup>      | 870±366 <sup>ab</sup>      | 7.82E-03 | 1.33E-02     |
| 3'SL                           | 541±293                   | 472±251                   | 514±239                   | 427±220                    | 2.50E-02 | 3.40E-02     |
| DFLac                          | 338±266 <sup>a</sup>      | 338±258 <sup>a</sup>      | 318±303 <sup>a</sup>      | 160±170 <sup>b</sup>       | 1.33E-03 | 2.51E-03     |
| 6'SL                           | 497±357 <sup>a</sup>      | 451±214 <sup>a</sup>      | 614±458 <sup>a</sup>      | 368±397 <sup>b</sup>       | 3.10E-04 | 8.11E-04     |
| LNT                            | 1508±1041                 | 1648±980                  | 1629±1229                 | 1371±835                   | 2.85E-01 | 2.93E-01     |
| LNFP I                         | 1132±1009                 | 1140±1197                 | 1138±1262                 | 879±1071                   | 1.22E-01 | 1.33E-01     |
| LNFP II                        | 1644±1101 <sup>ab</sup>   | 1810±1228 <sup>a</sup>    | 1328±993 <sup>b</sup>     | 1729±1057 <sup>ab</sup>    | 3.97E-02 | 5.00E-02     |
| LNFP III                       | 67±94 <sup>a</sup>        | 31±41 <sup>b</sup>        | 47±37 <sup>a</sup>        | 44±55 <sup>ab</sup>        | 1.08E-03 | 2.17E-03     |
| LSTb                           | 92±68                     | 93±60                     | 99±83                     | 90±44                      | 8.65E-01 | 8.65E-01     |
| LSTc                           | 142±121 <sup>a</sup>      | 132±74 <sup>a</sup>       | 174±135 <sup>a</sup>      | 100±118 <sup>b</sup>       | 4.08E-04 | 9.92E-04     |
| DFLNT                          | 1249±819 <sup>a</sup>     | 939±766 <sup>b</sup>      | 969±891 <sup>b</sup>      | 701±759 <sup>b</sup>       | 3.71E-05 | 1.58E-04     |
| LNH                            | 98±76                     | 84±63                     | 88±72                     | 69±52                      | 4.67E-02 | 5.67E-02     |
| DSLNT                          | 420±301 <sup>ab</sup>     | 540±370 <sup>c</sup>      | 441±276 <sup>ac</sup>     | 317±189 <sup>b</sup>       | 1.04E-03 | 2.17E-03     |
| FLNH                           | 48±52 <sup>a</sup>        | 29±29 <sup>a</sup>        | 46±66 <sup>a</sup>        | 4±3 <sup>b</sup>           | 4.84E-11 | 1.64E-09     |
| DFLNH                          | 134±129                   | 106±109                   | 96±86                     | 88±99                      | 2.33E-02 | 3.40E-02     |
| FDSLNH                         | 220±208 <sup>ab</sup>     | 239±185 <sup>a</sup>      | 215±221 <sup>ab</sup>     | 166±200 <sup>b</sup>       | 3.03E-02 | 3.97E-02     |
| DSLNH                          | 99±94 <sup>a</sup>        | 108±78 <sup>a</sup>       | 108±91 <sup>a</sup>       | 49±46 <sup>b</sup>         | 2.43E-04 | 7.51E-04     |
| Total HMOs                     | 14011±3736 <sup>a</sup>   | 12634±3439 <sup>b</sup>   | 11871±4558 <sup>b</sup>   | 9768±3863 <sup>c</sup>     | 3.71E-08 | 4.21E-07     |
| Small HMOs                     | 5995±3409 <sup>a</sup>    | 4391±2767 <sup>b</sup>    | 4333±3481 <sup>b</sup>    | 3130±2349 <sup>b</sup>     | 3.21E-07 | 2.18E-06     |
| Modified lactose               | 238310±31136 <sup>a</sup> | 241837±37969 <sup>a</sup> | 225019±27337 <sup>b</sup> | 236339±27814 <sup>ab</sup> | 5.35E-03 | 9.58E-03     |
| Type 1 HMOs                    | 4796±2036                 | 5230±2038                 | 4635±2112                 | 4385±1679                  | 8.00E-02 | 9.06E-02     |
| Type 2 HMOs                    | 1034±548                  | 1169±578                  | 1063±660                  | 1015±440                   | 1.25E-01 | 1.33E-01     |
| α-1-2-fucosylated HMOs         | 5877±4005 <sup>a</sup>    | 4455±3611 <sup>b</sup>    | 4169±4049 <sup>bc</sup>   | 3013±3426 <sup>c</sup>     | 1.05E-05 | 5.08E-05     |
| terminal α-2-6-sialylated HMOs | 638±445 <sup>a</sup>      | 582±265 <sup>a</sup>      | 788±552 <sup>a</sup>      | 469±479 <sup>b</sup>       | 1.69E-04 | 5.74E-04     |
| internal α-2-6-sialylated HMOs | 511±342 <sup>a</sup>      | 633±415 <sup>b</sup>      | 540±328 <sup>ab</sup>     | 406±213 <sup>a</sup>       | 8.97E-03 | 1.45E-02     |
| terminal α-2-3-sialylated HMOs | 961±423 <sup>a</sup>      | 1012±466 <sup>a</sup>     | 955±400 <sup>a</sup>      | 744±341 <sup>b</sup>       | 1.48E-02 | 2.29E-02     |
| HMO-bound Sia                  | 2749±1188 <sup>a</sup>    | 2921±1131 <sup>a</sup>    | 2928±1238 <sup>a</sup>    | 2049±1021 <sup>b</sup>     | 2.87E-04 | 8.11E-04     |
| HMO-bound Fuc                  | 11511±4221 <sup>a</sup>   | 9485±3568 <sup>b</sup>    | 8745±5240 <sup>bc</sup>   | 7056±3826 <sup>c</sup>     | 8.67E-09 | 1.47E-07     |
| HMO-bound Sia/total HMO        | 0.21±0.1 <sup>a</sup>     | 0.24±0.09 <sup>b</sup>    | 0.27±0.13 <sup>b</sup>    | 0.22±0.09 <sup>ab</sup>    | 4.57E-04 | 1.04E-03     |
| HMO-bound Fuc/total HMO        | 0.81±0.17 <sup>a</sup>    | 0.74±0.17 <sup>b</sup>    | 0.69±0.25 <sup>b</sup>    | 0.7±0.19 <sup>b</sup>      | 2.55E-06 | 1.45E-05     |
| HMO-bound Fuc/HMO-bound Sia    | 4.94±2.62 <sup>a</sup>    | 3.72±1.86 <sup>b</sup>    | 3.55±2.52 <sup>b</sup>    | 4.19±2.92 <sup>ab</sup>    | 6.31E-05 | 2.38E-04     |

**Footnote:** Concentrations are given as nmol/mL; mean ± sd. *P* values were calculated from Kruskal-Wallis test (followed by Dunn's post hoc test; letters denote significance groups, *p* < 0.05). 2'-fucosyllactose (2'FL), 3-fucosyllactose (3FL), lacto-N-neotetraose (LNnT), 3'-sialyllactose (3'SL), difucosyllactose (DFLac), 6'-sialyllactose (6'SL), lacto-N-tetraose (LNT), lacto-N-fucopentaose (LNFP) I, LNFP II, LNFP III, sialyl-LNT (LST) b, LSTc, difucosyllacto-LNT (DFLNT), lacto-N-hexaose (LNH), disialyllacto-N-tetraose (DSLNT), fucosyllacto-N-hexaose (FLNH), difucosyllacto-N-hexaose (DFLNH), fucodisialyllacto-lacto-N-hexaose (FDSLNH) and disialyllacto-N-hexaose (DSLNH); small HMOs (2'FL, 3FL, 3'SL, 6'SL, and DFLac), modified lactose (small HMOs and lactose), type 1 HMOs (LNT, LNFP I, LNFP II, LSTb, and DSLNT), type 2 HMOs (LNnT, LNFP III, and LSTc), α-1-2-fucosylated HMOs (2'FL

and LNFP I), terminal  $\alpha$ -2-6-sialylated HMOs (6'SL and LSTc), internal  $\alpha$ -2-6-sialylated HMOs (DSLNT and LSTb), terminal  $\alpha$ -2-3-sialylated HMOs (3'SL and DSLNT), ratio of HMO-bound sialic acid (Sia) to total HMOs (HMO-bound Sia/total HMOs), ratio of HMO-bound fucose (Fuc) to total HMOs (HMO-bound Fuc/total HMOs), and ratio of the ratio of HMO-bound Fuc to HMO-bound Sia (HMO-bound Fuc/HMO-bound Sia).

**Table S7. HMO concentrations and ratios between microbial enterotypes**

| HMO                            | Enterotype   |              |          |              |
|--------------------------------|--------------|--------------|----------|--------------|
|                                | E1           | E2           | <i>p</i> | FDR <i>p</i> |
| 2'FL                           | 3921±3314    | 3789±3125    | 6.96E-01 | 7.88E-01     |
| 3FL                            | 213±200      | 160±144      | 8.74E-03 | 4.78E-02     |
| LNnT                           | 821±501      | 950±535      | 6.29E-03 | 4.28E-02     |
| 3'SL                           | 539±286      | 468±241      | 9.84E-03 | 4.78E-02     |
| DFLac                          | 310±278      | 328±253      | 4.08E-01 | 6.60E-01     |
| 6'SL                           | 502±386      | 480±316      | 5.10E-01 | 6.86E-01     |
| LNT                            | 1515±1078    | 1594±992     | 2.02E-01 | 4.02E-01     |
| LNFP I                         | 994±979      | 1271±1242    | 7.64E-02 | 2.16E-01     |
| LNFP II                        | 1655±1120    | 1618±1118    | 6.11E-01 | 7.42E-01     |
| LNFP III                       | 63±88        | 39±45        | 7.58E-02 | 2.16E-01     |
| LSTb                           | 92±72        | 95±59        | 2.31E-01 | 4.13E-01     |
| LSTc                           | 133±125      | 151±99       | 2.94E-03 | 3.34E-02     |
| DFLNT                          | 1128±808     | 1002±860     | 5.13E-02 | 1.94E-01     |
| LNH                            | 87±64        | 94±80        | 8.88E-01 | 8.93E-01     |
| DSLNT                          | 398±288      | 502±333      | 5.30E-04 | 1.80E-02     |
| FLNH                           | 42±55        | 34±40        | 4.64E-01 | 6.86E-01     |
| DFLNH                          | 124±123      | 106±106      | 2.48E-01 | 4.22E-01     |
| FDSLNH                         | 219±212      | 218±195      | 8.93E-01 | 8.93E-01     |
| DSLNH                          | 96±94        | 100±78       | 1.74E-01 | 3.92E-01     |
| Total HMOs                     | 12852±4192   | 12997±3829   | 7.68E-01 | 8.16E-01     |
| Small HMOs                     | 5174±3441    | 4897±3173    | 5.01E-01 | 6.86E-01     |
| Modified lactose               | 236468±33410 | 237231±31015 | 5.24E-01 | 6.86E-01     |
| Type 1 HMOs                    | 4654±1959    | 5079±2095    | 6.74E-02 | 2.16E-01     |
| Type 2 HMOs                    | 1018±560     | 1139±569     | 1.23E-02 | 5.23E-02     |
| α1-2-fucosylated HMOs          | 4914±3997    | 5060±3958    | 6.84E-01 | 7.88E-01     |
| terminal α-2-6-sialylated HMOs | 635±479      | 630±383      | 1.85E-01 | 3.92E-01     |
| internal α-2-6-sialylated HMOs | 490±330      | 597±375      | 1.91E-03 | 3.25E-02     |
| terminal α-2-3-sialylated HMOs | 937±424      | 970±432      | 7.18E-01 | 7.88E-01     |
| HMO-bound Sia                  | 2692±1237    | 2833±1118    | 8.69E-02 | 2.18E-01     |
| HMO-bound Fuc                  | 10231±4725   | 10001±4120   | 5.52E-01 | 6.95E-01     |
| HMO-bound Sia/total HMO        | 0.23±0.11    | 0.23±0.09    | 4.55E-01 | 6.86E-01     |
| HMO-bound Fuc/total HMO        | 0.77±0.2     | 0.75±0.18    | 8.99E-02 | 2.18E-01     |
| HMO-bound Fuc/HMO-bound Sia    | 4.59±2.86    | 4.01±1.97    | 2.13E-01 | 4.02E-01     |

**Footnote:** Concentrations are given as nmol/mL; mean ± sd. 2'-fucosyllactose (2'FL), 3-fucosyllactose (3FL), lacto-N-neotetraose (LNnT), 3'-sialyllactose (3'SL), difucosyllactose (DFLac), 6'-sialyllactose (6'SL), lacto-N-tetraose (LNT), lacto-N-fucopentaose (LNFP) I, LNFP II, LNFP III, sialyl-LNT (LST) b, LSTc, difucosyllacto-LNT (DFLNT), lacto-N-hexaose (LNH), disialyllacto-N-tetraose (DSLNT), fucosyllacto-N-hexaose (FLNH), difucosyllacto-N-hexaose (DFLNH), fucodisialyllacto-lacto-N-hexaose (FDSLNH) and disialyllacto-N-hexaose (DSLNH); small HMOs (2'FL, 3FL,

3'SL, 6'SL, and DFLac), modified lactose (small HMOs and lactose), type 1 HMOs (LNT, LNFP I, LNFP II, LSTb, and DSLNT), type 2 HMOs (LNnT, LNFP III, and LSTc),  $\alpha$ -1-2-fucosylated HMOs (2'FL and LNFP I), terminal  $\alpha$ -2-6-sialylated HMOs (6'SL and LSTc), internal  $\alpha$ -2-6-sialylated HMOs (DSLNT and LSTb), terminal  $\alpha$ -2-3-sialylated HMOs (3'SL and DSLNT), ratio of HMO-bound sialic acid (Sia) to total HMOs (HMO-bound Sia/total HMOs), ratio of HMO-bound fucose (Fuc) to total HMOs (HMO-bound Fuc/total HMOs), and ratio of the ratio of HMO-bound Fuc to HMO-bound Sia (HMO-bound Fuc/HMO-bound Sia).
