# Supplementary figures and images for: Variation in Human Milk Composition Is Related to Differences in Milk and Infant Fecal Microbial Communities
Source: MDPI journal article supplement (doi:10.3390/microorganisms9061153), 2021-05-27

**A**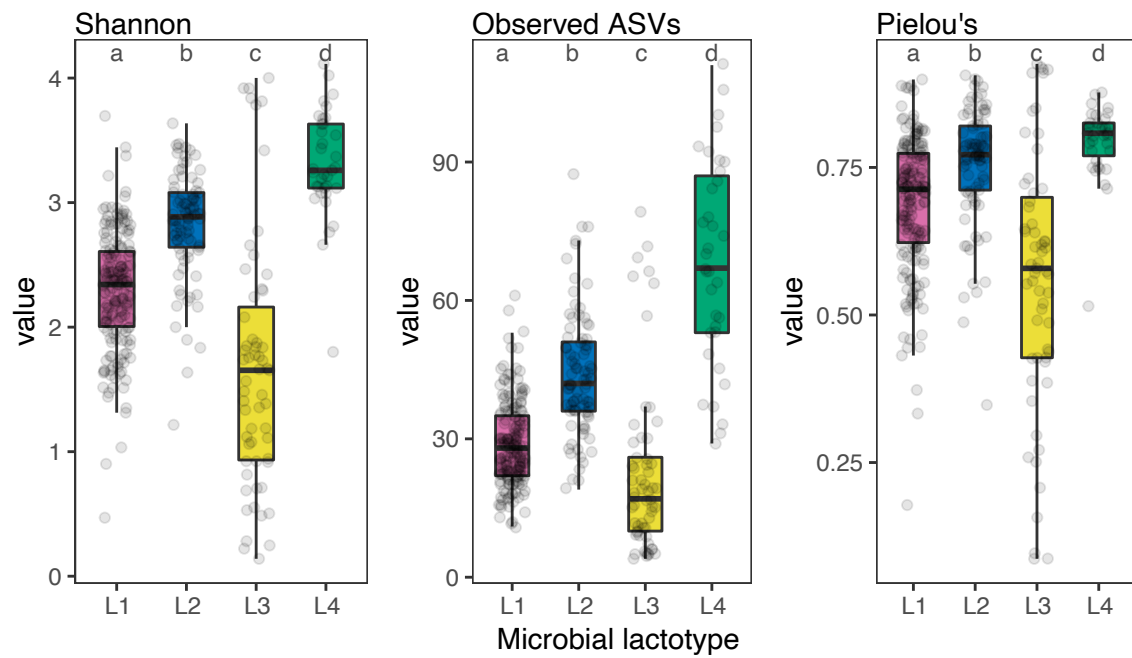**B**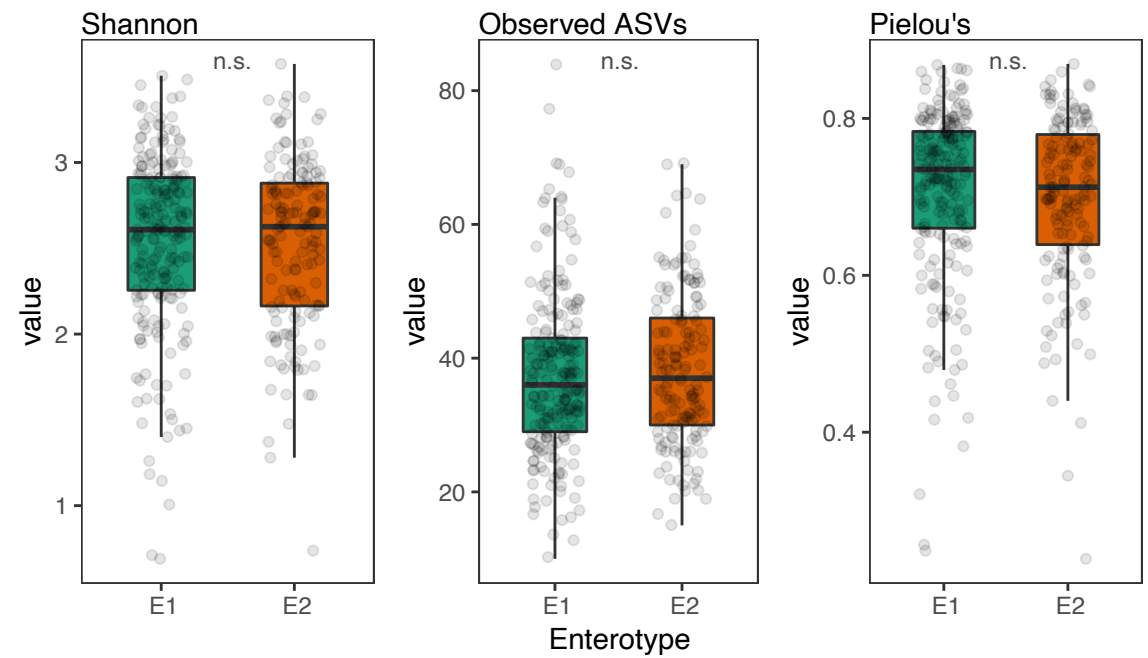**C**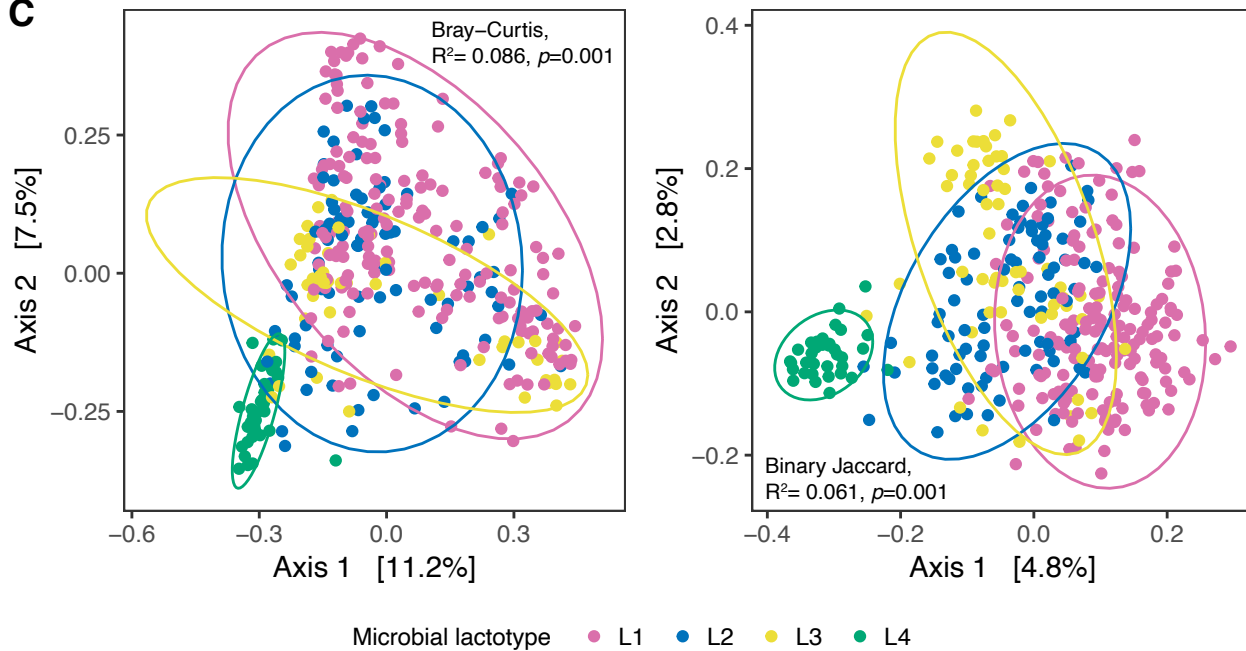**D**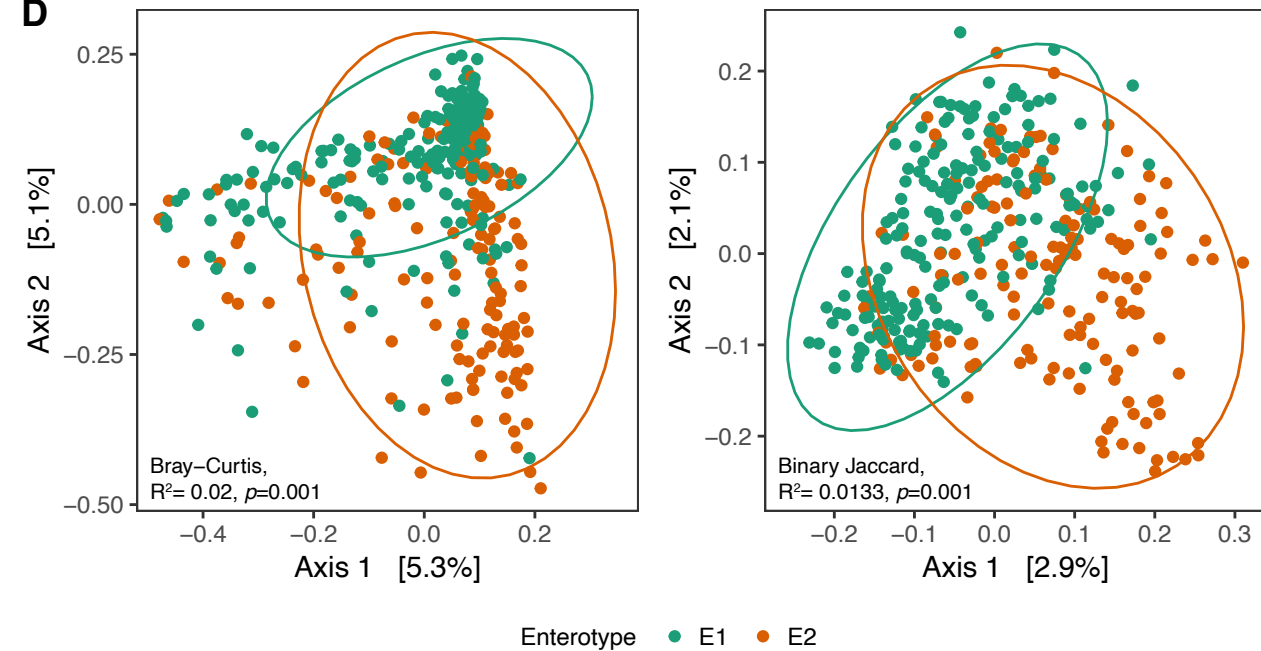

Supplement: s1 [file s1]

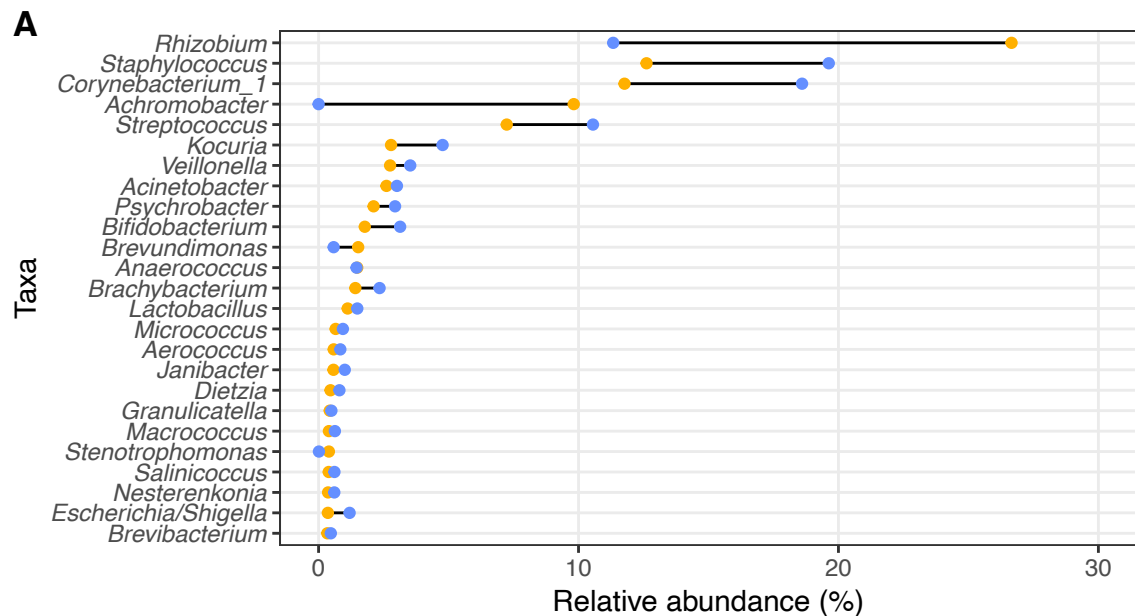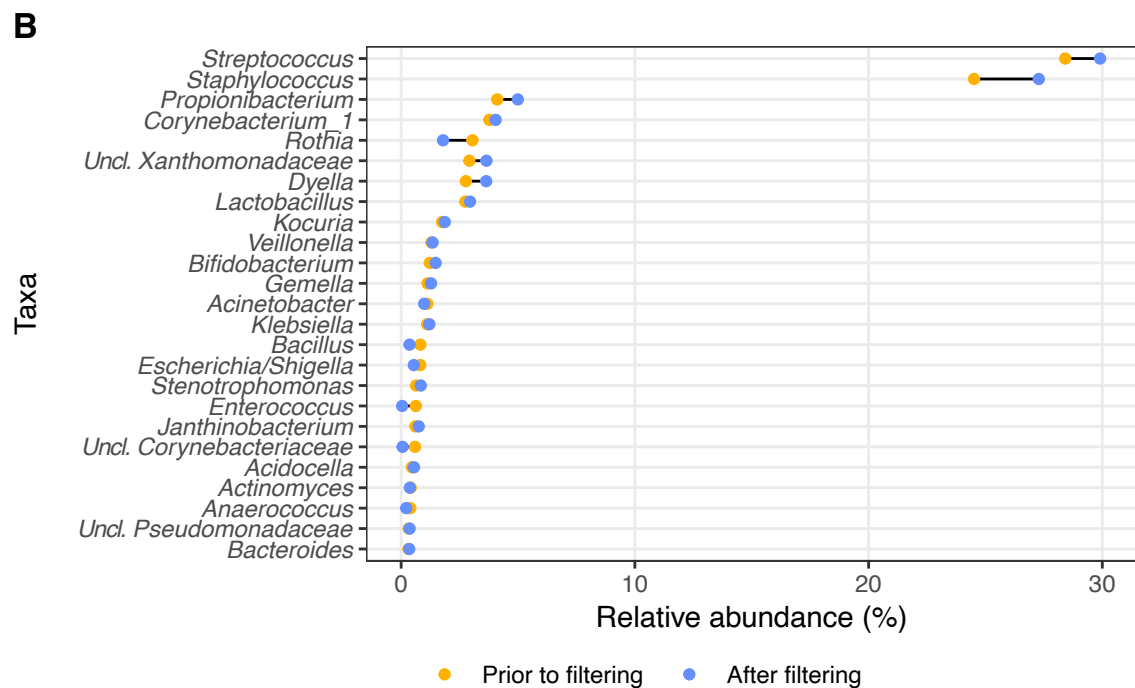

Supplement: s1 [file s1]

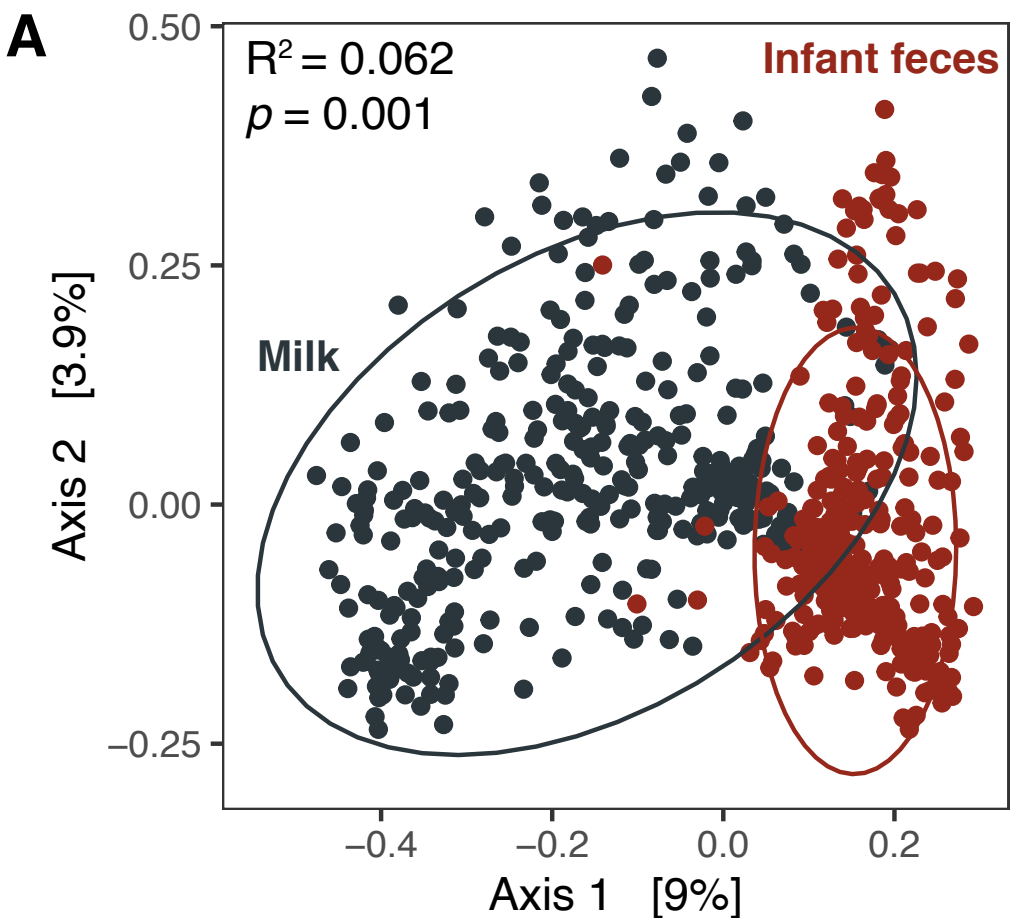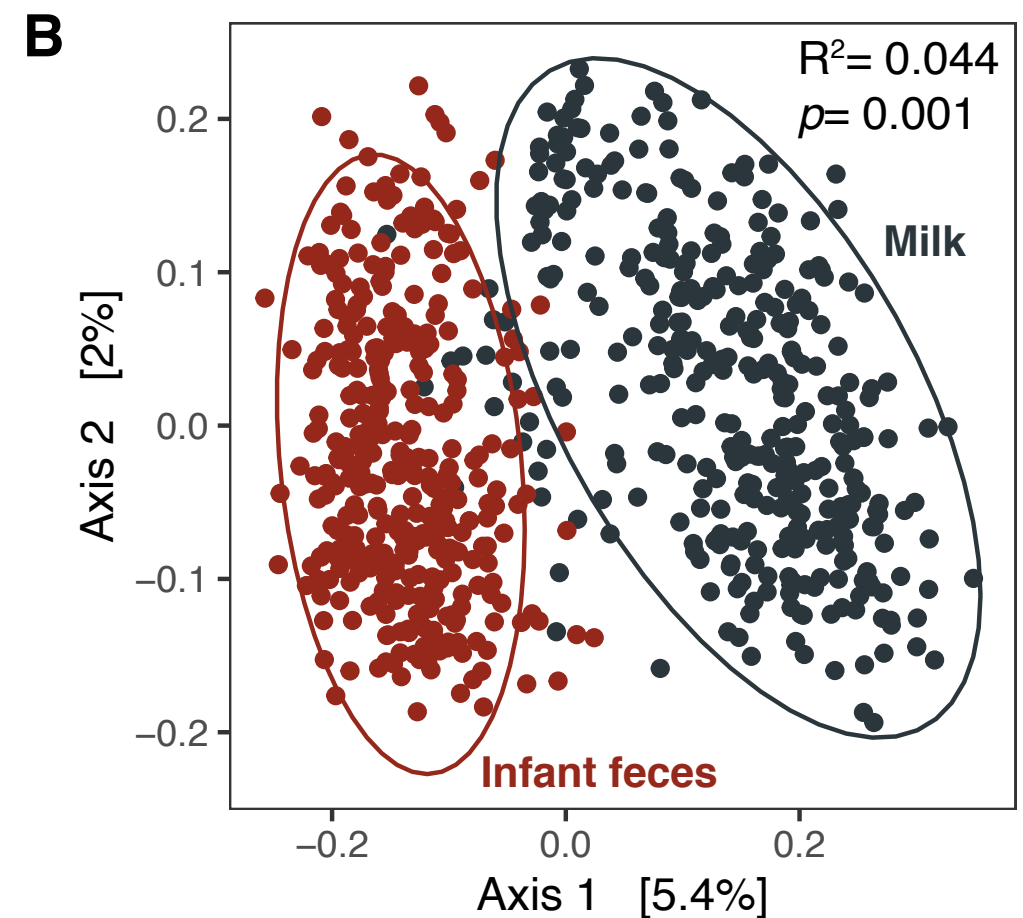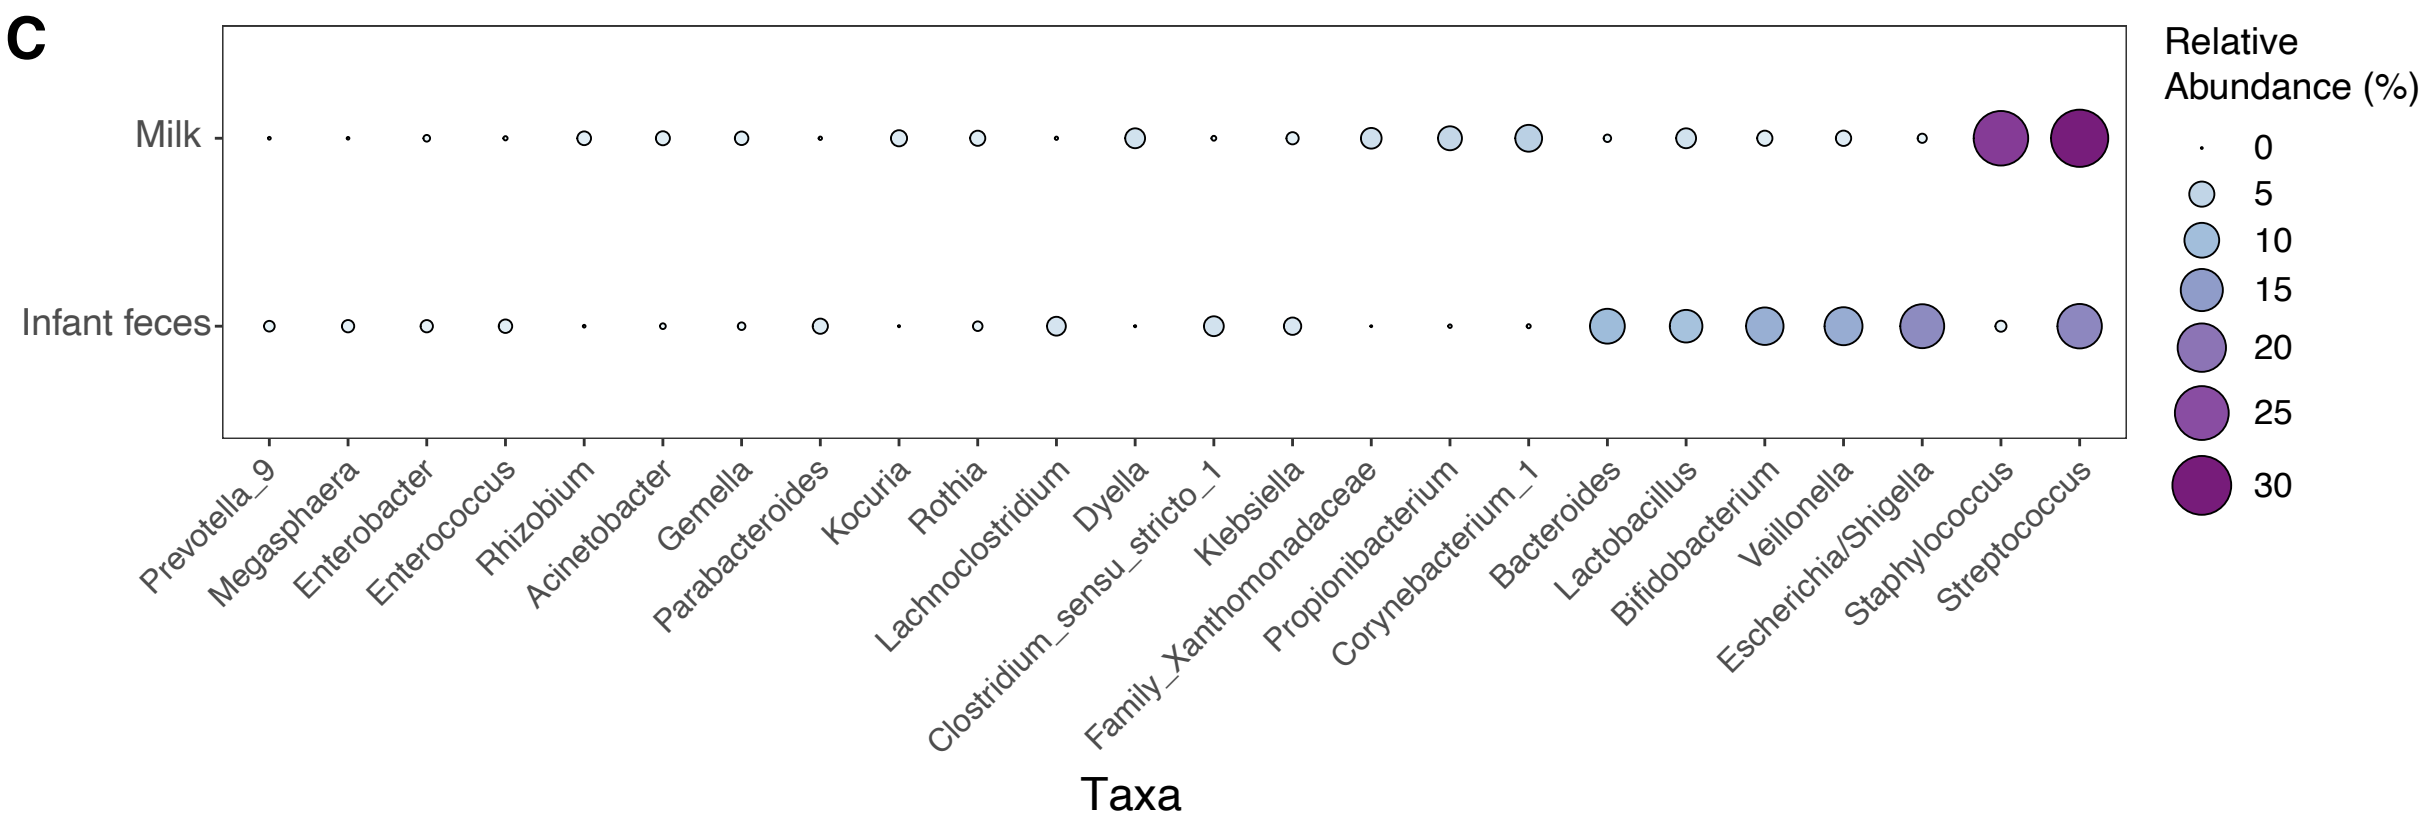

Supplement: s1 [file s1]

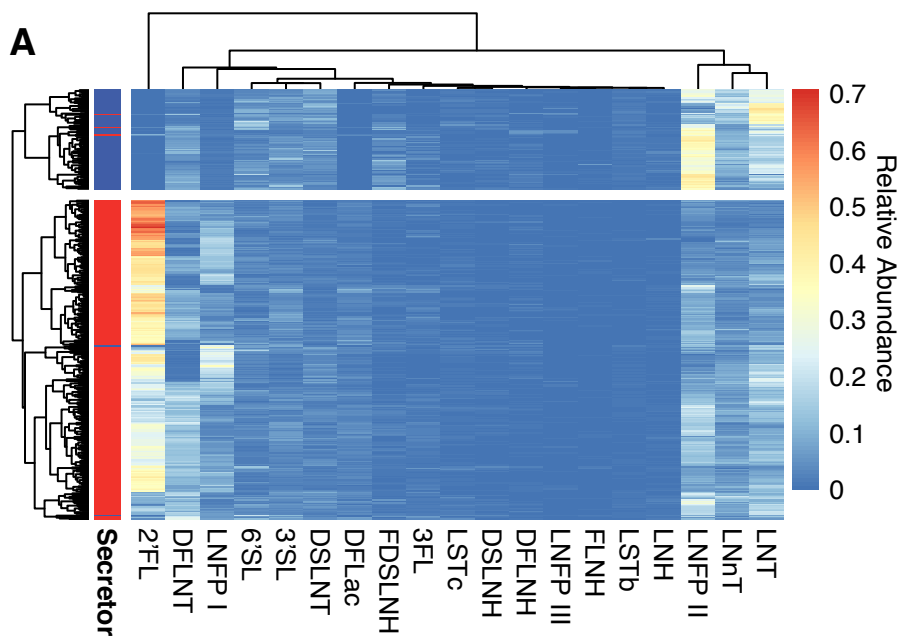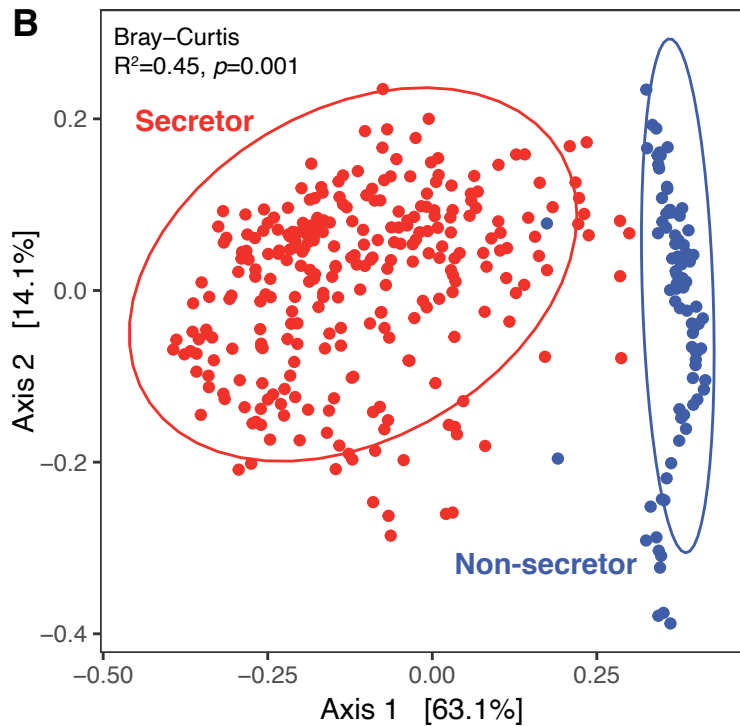

Supplement: s1 [file s1]
